# Supplementary material for: Poly Caprolactam Supported Hexaethylene Glycolic Imidazolium Ionic Liquid as a Heterogeneous Promoter for Nucleophilic Fluorination
Source: MDPI journal article supplement (doi:10.3390/molecules28186747), 2023-09-21

## Supplementary Information

### Poly Caprolactam Supported Hexaethylene Glycolic Imidazolium Ionic Liquid as a Heterogeneous Promoter for Nucleophilic Fluorination

#### 1. Preparation of PCLS-hexaEGIM

**Preparation of 3-(17-hydroxy-3,6,9,12,15-pentaoxaheptadecyl)-1-vinyl-1*H*-imidazol-3-ium methanesulfonate (hexaEGVIM 2).** Vinyl-1*H*-imidazole (376 mg, 4.00 mmol) was added dropwise to the solution of 1.44 g (4.00 mmol) of 17-hydroxy-3,6,9,12,15-pentaoxaheptadecyl methanesulfonate in CH<sub>3</sub>CN (50 mL). The reaction mixture was stirred for 24 h at 90 °C. After CH<sub>3</sub>CN was removed under reduced pressure, the residue was washed several times with ethyl acetate (10 mL × 10) and dried under high vacuum overnight at room temperature to obtain 1.6 g (1.87 mmol, 93%) of hexaEGVIM 2 as a white liquid. <sup>1</sup>H-NMR (400 MHz, CDCl<sub>3</sub>) δ 9.54 (s, 1H), 7.73 (dt, *J* = 23.8, 1.8 Hz, 2H), 7.21 (dd, *J* = 15.6, 8.7 Hz, 1H), 5.78 (dd, *J* = 15.6, 2.7 Hz, 1H), 5.24 (dd, *J* = 8.7, 2.7 Hz, 1H), 4.44 (t, *J* = 4.6 Hz, 2H), 3.77 (t, *J* = 4.8 Hz, 2H), 3.65 (s, 1H), 3.56-3.41 (m, 20H), 2.61 (s, 3H); <sup>13</sup>C NMR (100 MHz, CDCl<sub>3</sub>) δ: 135.7, 128.4, 124.0, 118.6, 108.8, 72.4, 70.1, 70.0, 69.9, 69.8, 69.7, 68.5, 60.8, 49.5, 39.2. HRMS (EI, *m/z*): calcd for C<sub>18</sub>H<sub>34</sub>N<sub>2</sub>O<sub>9</sub>S 454.1985, found: 454.1980.

**Preparation of poly caprolactam supported hexaethylene glycol substituted imidazolium salts (PCLS-hexaEGIM).** The mixture solution of *N*-vinyl caprolactam (5.0 g, 35 mmol), hexaEGVIM 2 (2.0 g, 4.4 mmol), and AIBN (100 mg, 0.6 mmol) in CH<sub>2</sub>Cl<sub>2</sub> (50 mL) was placed in around bottom flask. The polymerization reaction was performed at 70 °C for 24 h under N<sub>2</sub>. After completion of the reaction, the PCLS-hexaEGIM (4.2 g) was collected by

simple filtration, washing with acetone (250 mL  $\times$  3) and methanol (250 mL  $\times$  3), and drying under high vacuum at 50 °C overnight.

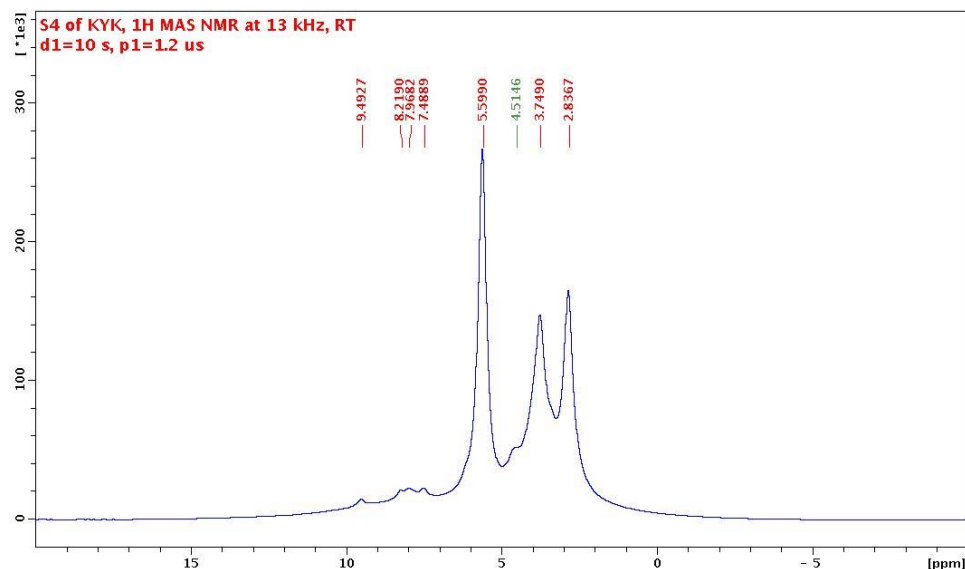

**Figure S1.** Solid state  $^1\text{H}$  NMR spectrum of PCLS-hexaEGIM

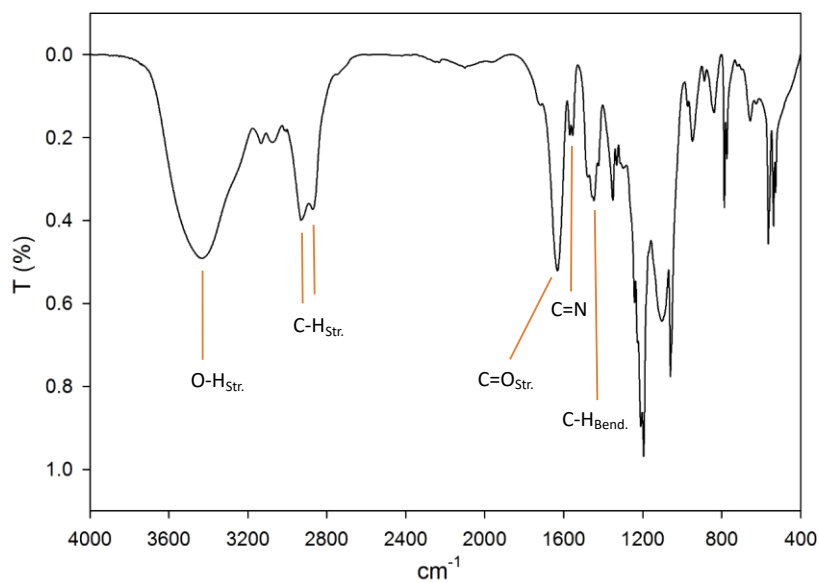

**Figure S2.** FT-IR spectrum of PCLS-hexaEGIM.

In the FT-IR spectrum of PCLS-hexaEGIM (Figure 2), the hydroxy group of ethylene glycol at the side chain was observed as a broad peak at  $3429.7\text{ cm}^{-1}$ . All the C–H symmetric and asymmetric stretching and bending vibrations appeared at  $2927.2$ ,  $2890.4$ , and  $1449.7$

cm<sup>-1</sup>, respectively. In this spectrum, the lactone N–H vibration disappeared, and the carbonyl (C=O) stretching vibrations of the lactone ring and the imidazole C=N stretching vibrations were observed at 1629.7 and 1562.8 cm<sup>-1</sup>, respectively, indicating the successful connection of the lactone ring and imidazole rings in polymerization. All the remaining absorption peaks, such as C–N, mesylate S=O, and S–O stretching vibrations, appear at their relative absorption area.

## 2. *Typical procedure of the fluorination.*

**Typical procedure of nucleophilic fluorination in Table 1 (entry 1).** CsF (456 mg, 3 mmol) was added to the mixture of 2-(3-methanesulfonyloxypoxy)naphthalene (**3**, 281 mg, 1.0 mmol) and PCLS-hexaEGIM (279 mg, 0.3 mmol) in CH<sub>3</sub>CN (4 mL) in a reaction vial. The reaction mixture was stirred over 2 h at 90 °C. The reaction time was determined by checking TLC. The reaction mixture was filtered and washed with diethyl ether, and the filtrate was evaporated under reduced pressure. Flash column chromatography (10% EtOAc/hexanes) of the filtrate afforded 192 mg (0.94 mmol, 94%) of 2-(3-fluoropropoxy)naphthalene (**4a**) as a white solid; <sup>1</sup>H NMR (400 MHz, CDCl<sub>3</sub>) <sup>1</sup>H-NMR (400 MHz, CDCl<sub>3</sub>) δ 7.73 (q, *J* = 8.2 Hz, 3H), 7.42 (td, *J* = 7.5, 1.1 Hz, 1H), 7.32 (td, *J* = 7.5, 1.4 Hz, 1H), 7.15-7.11 (m, 2H), 4.68 (dt, *J* = 47.2, 5.7 Hz, 2H), 4.21 (t, *J* = 6.2 Hz, 2H), 2.29-2.14 (m, 2H); <sup>13</sup>C NMR (100 MHz, CDCl<sub>3</sub>) δ 156.6, 134.5, 129.4, 129.0, 127.6, 126.7, 126.3, 123.6, 118.7, 106.6, 80.7 (d, *J* = 163.8 Hz), 63.5 (d, *J* = 5.8 Hz) 30.4 (d, *J* = 19.2 Hz). HRMS (EI, *m/z*): calcd for C<sub>13</sub>H<sub>13</sub>FO 204.0950, found: 204.0949.

### *Spectral data of intermediates, HexaEGVIM 2.*

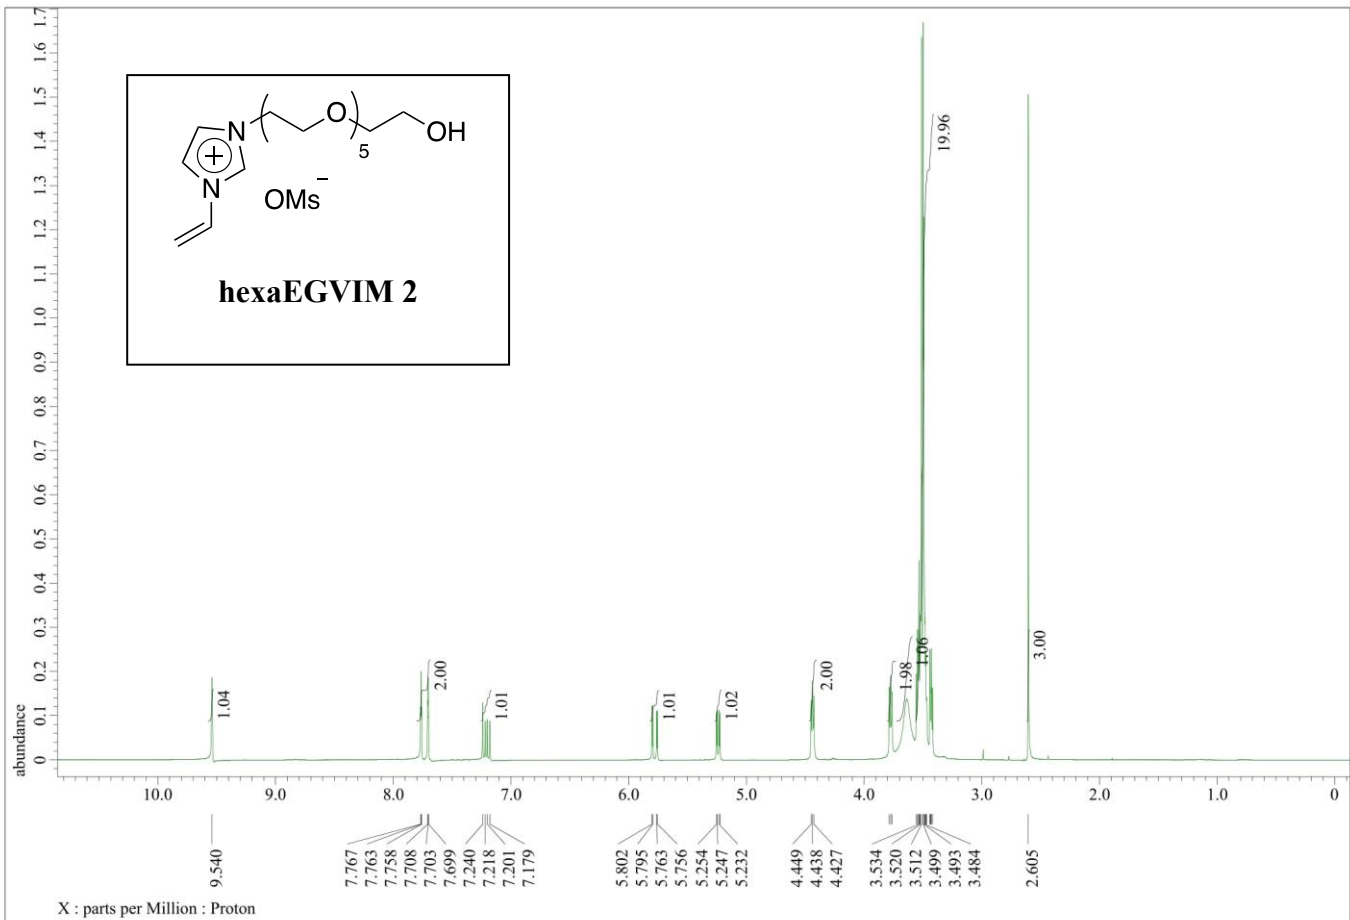



*<sup>1</sup>H-NMR- spectra of 2-(3-Fluoropropoxy)naphthalene (4a).*

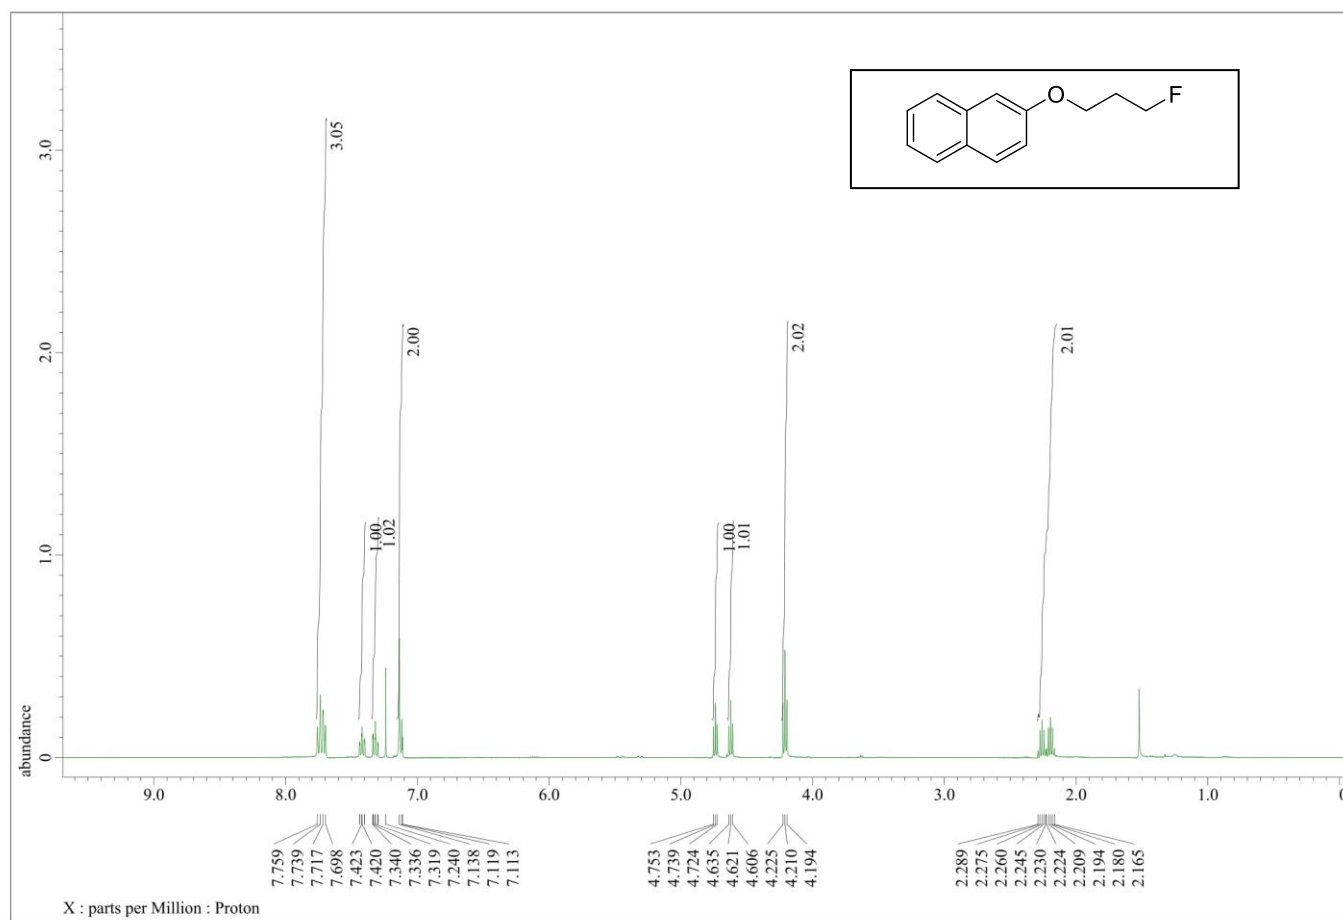

$^{31}\text{C}$ -NMR-spectra of 2-(3-Fluoropropoxy)naphthalene (**4a**).

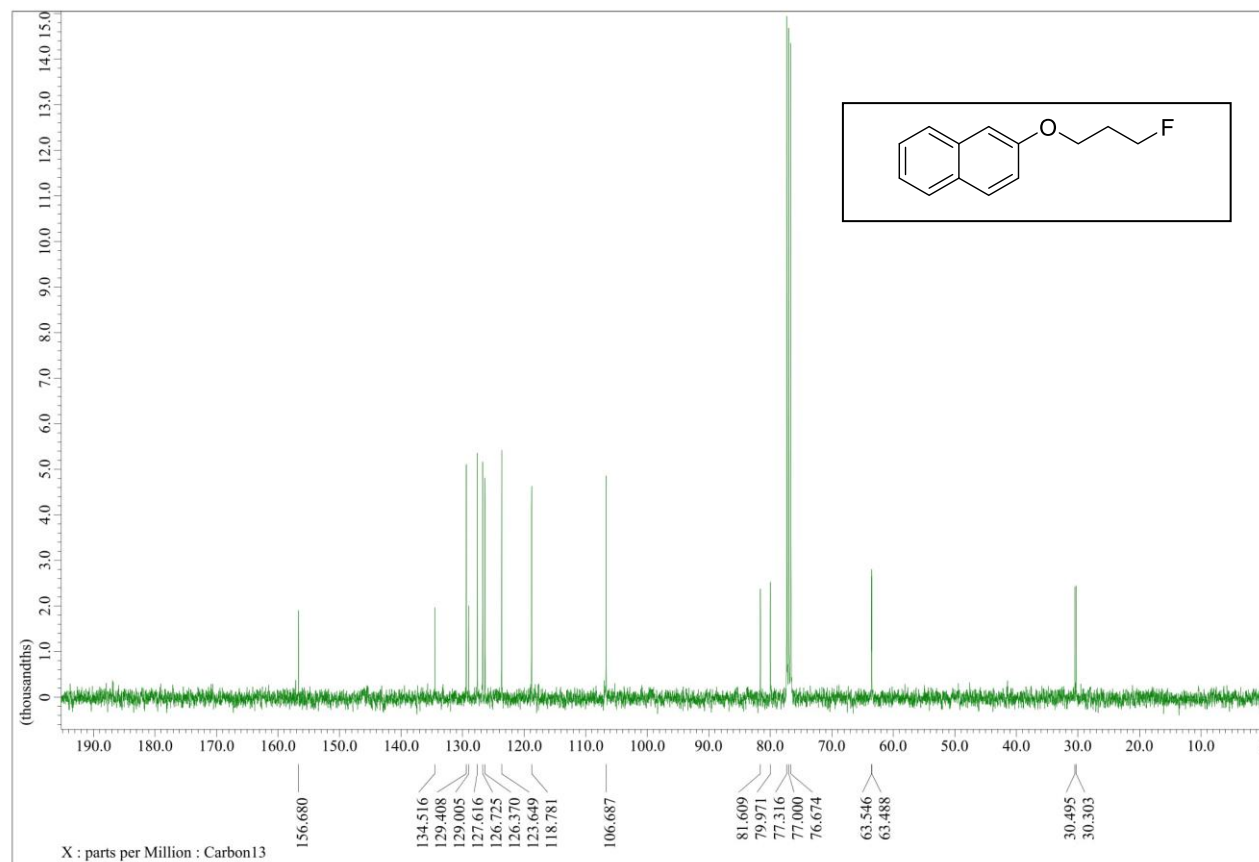

*<sup>1</sup>H and <sup>13</sup>C NMR spectra of products in Table 2.*

**2-(2-fluoropropoxy)naphthalene (5).**

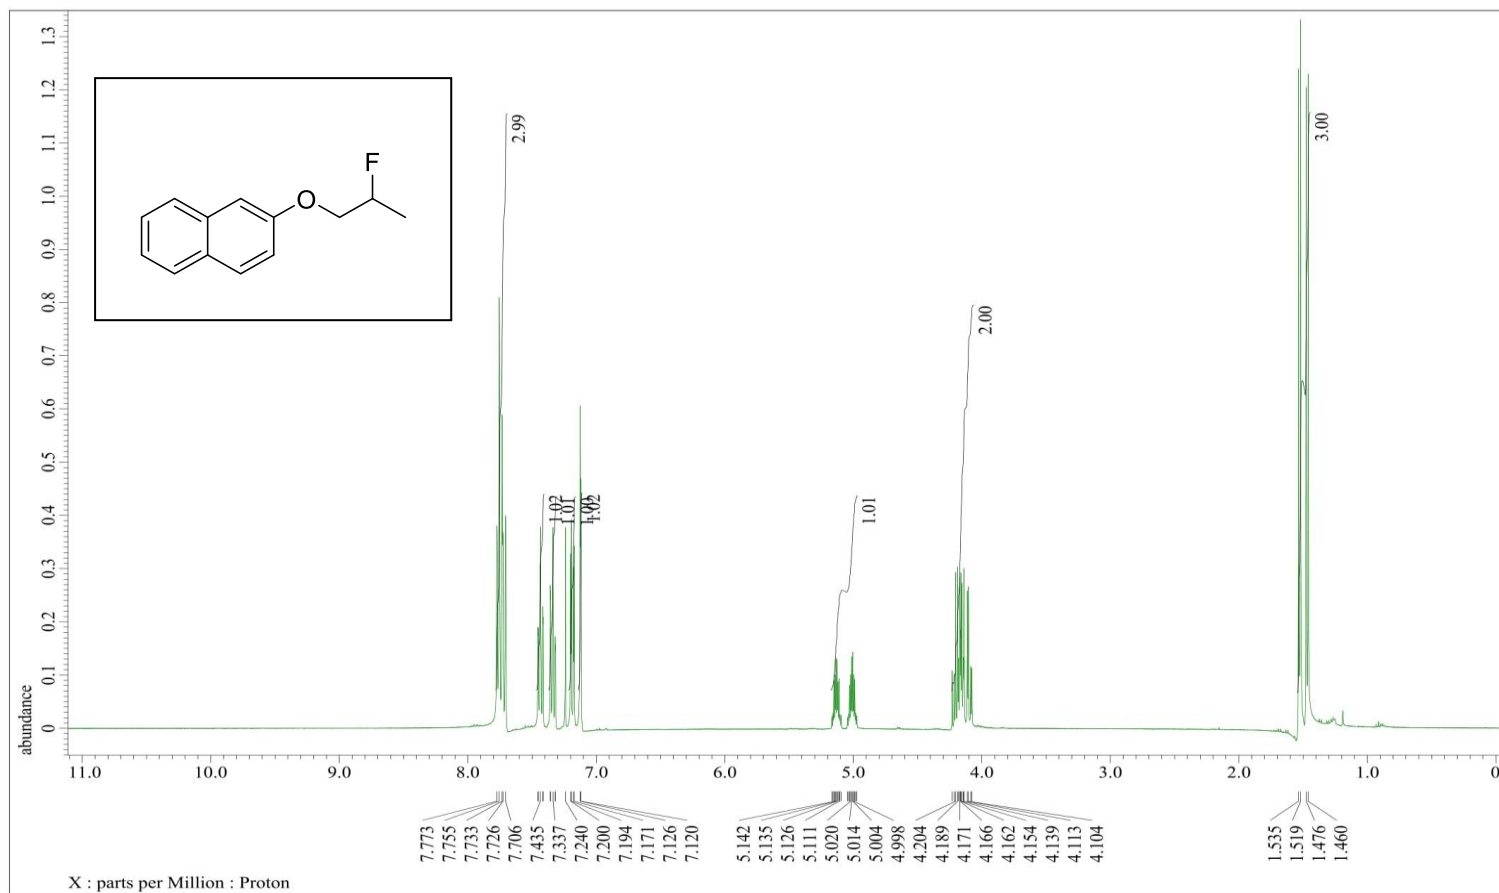



**2-(2-fluoropropoxy)naphthalene (5).**

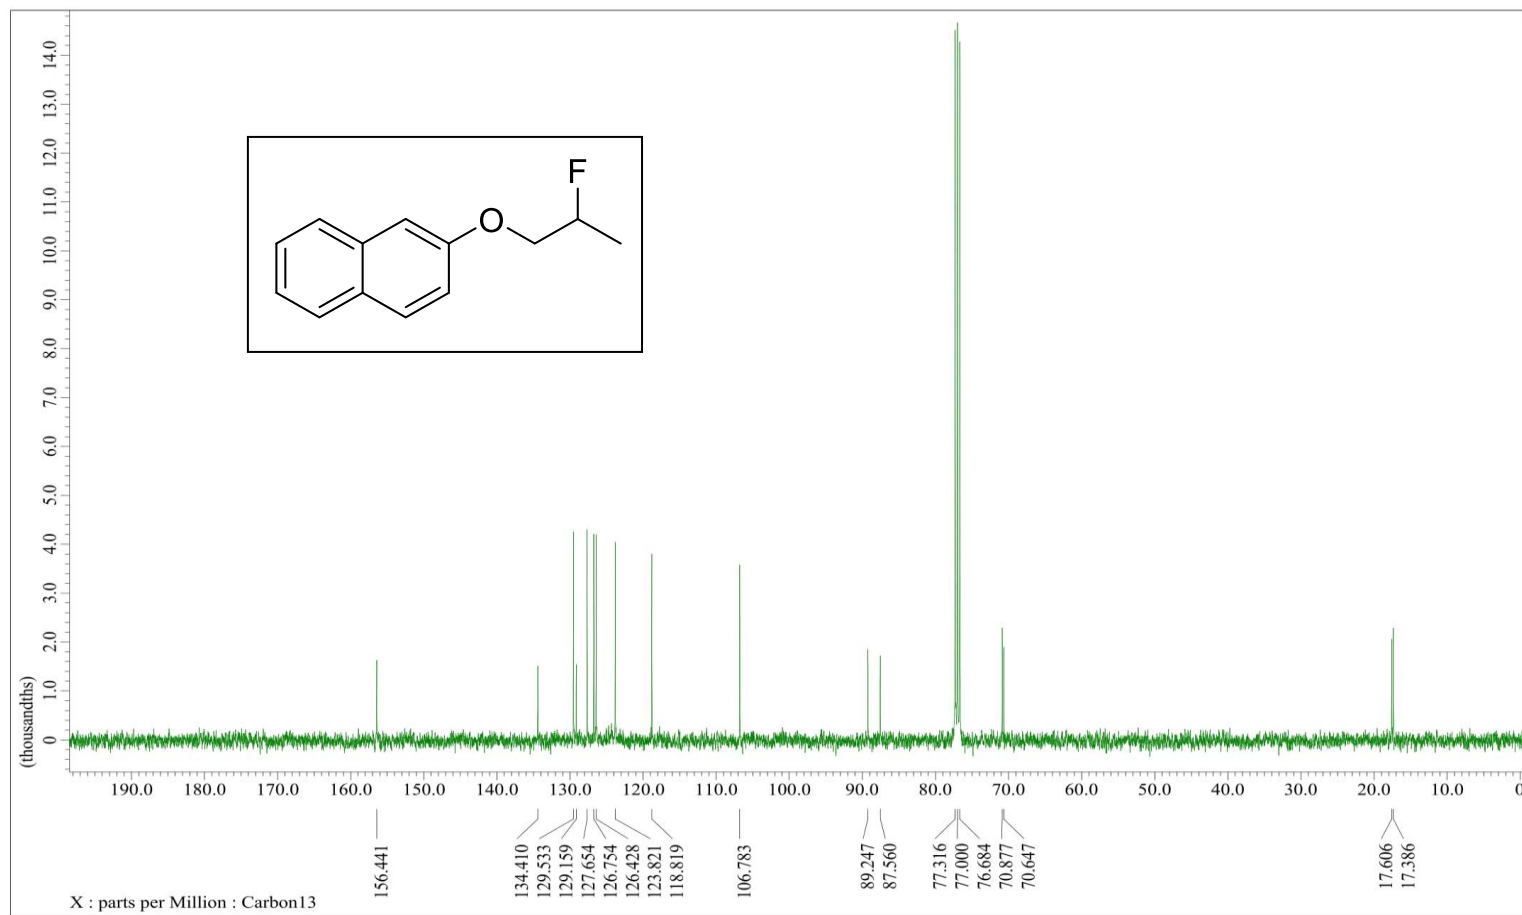

1-(2-Fluoroethyl)naphthalene (6).

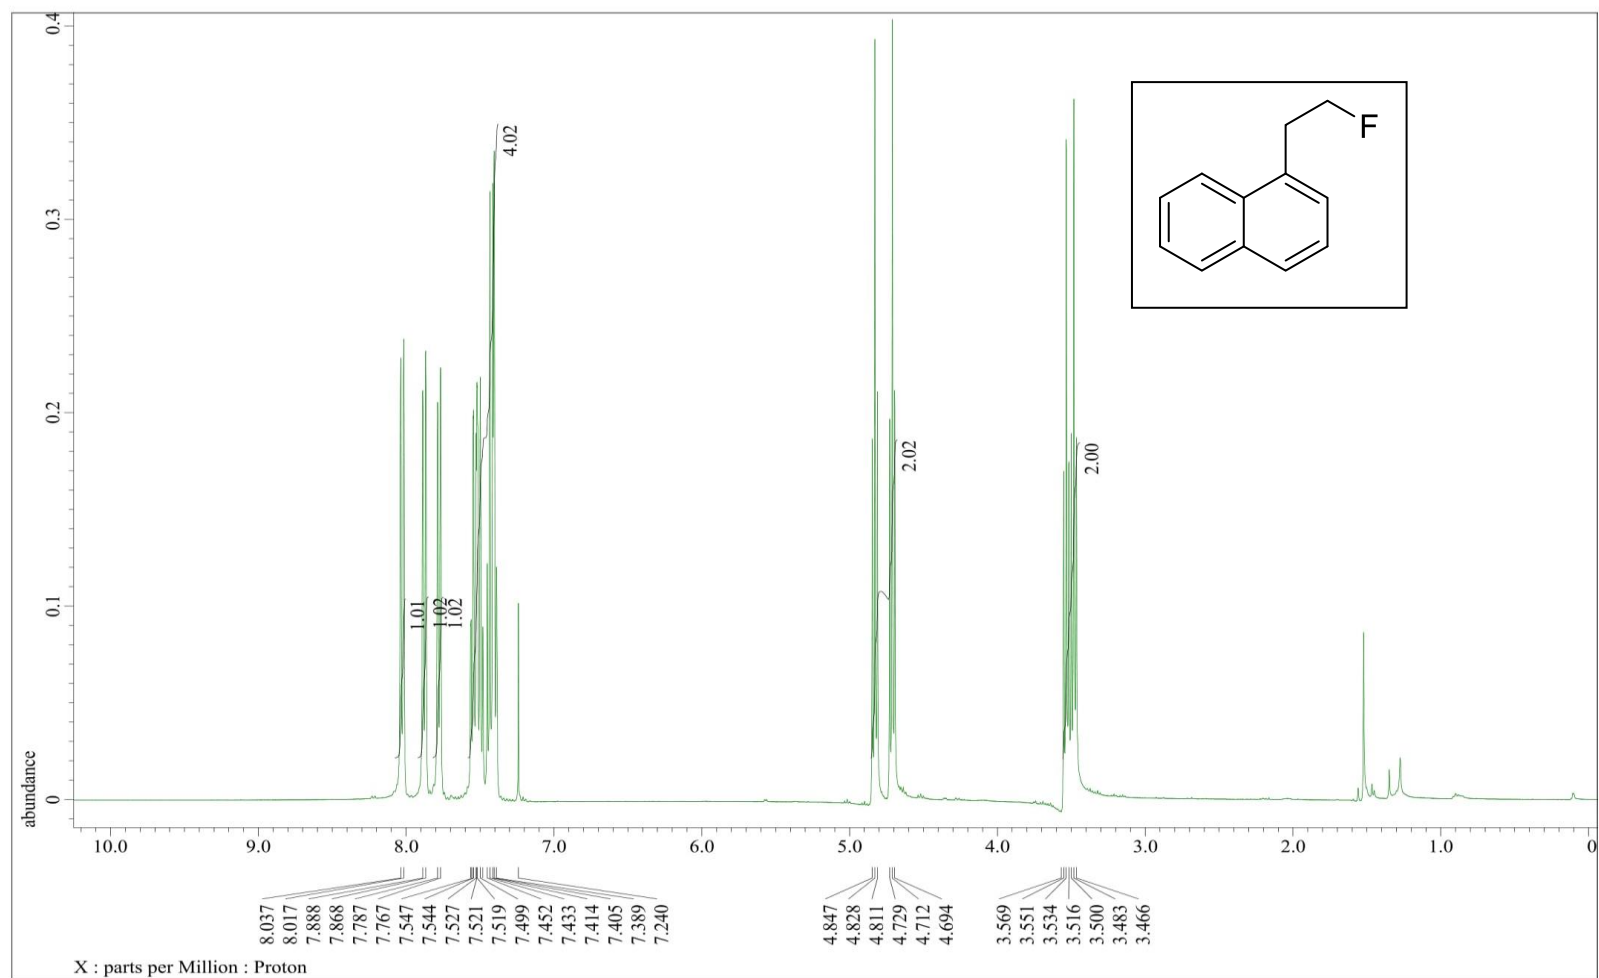

1-(2-Fluoroethyl)naphthalene (6).

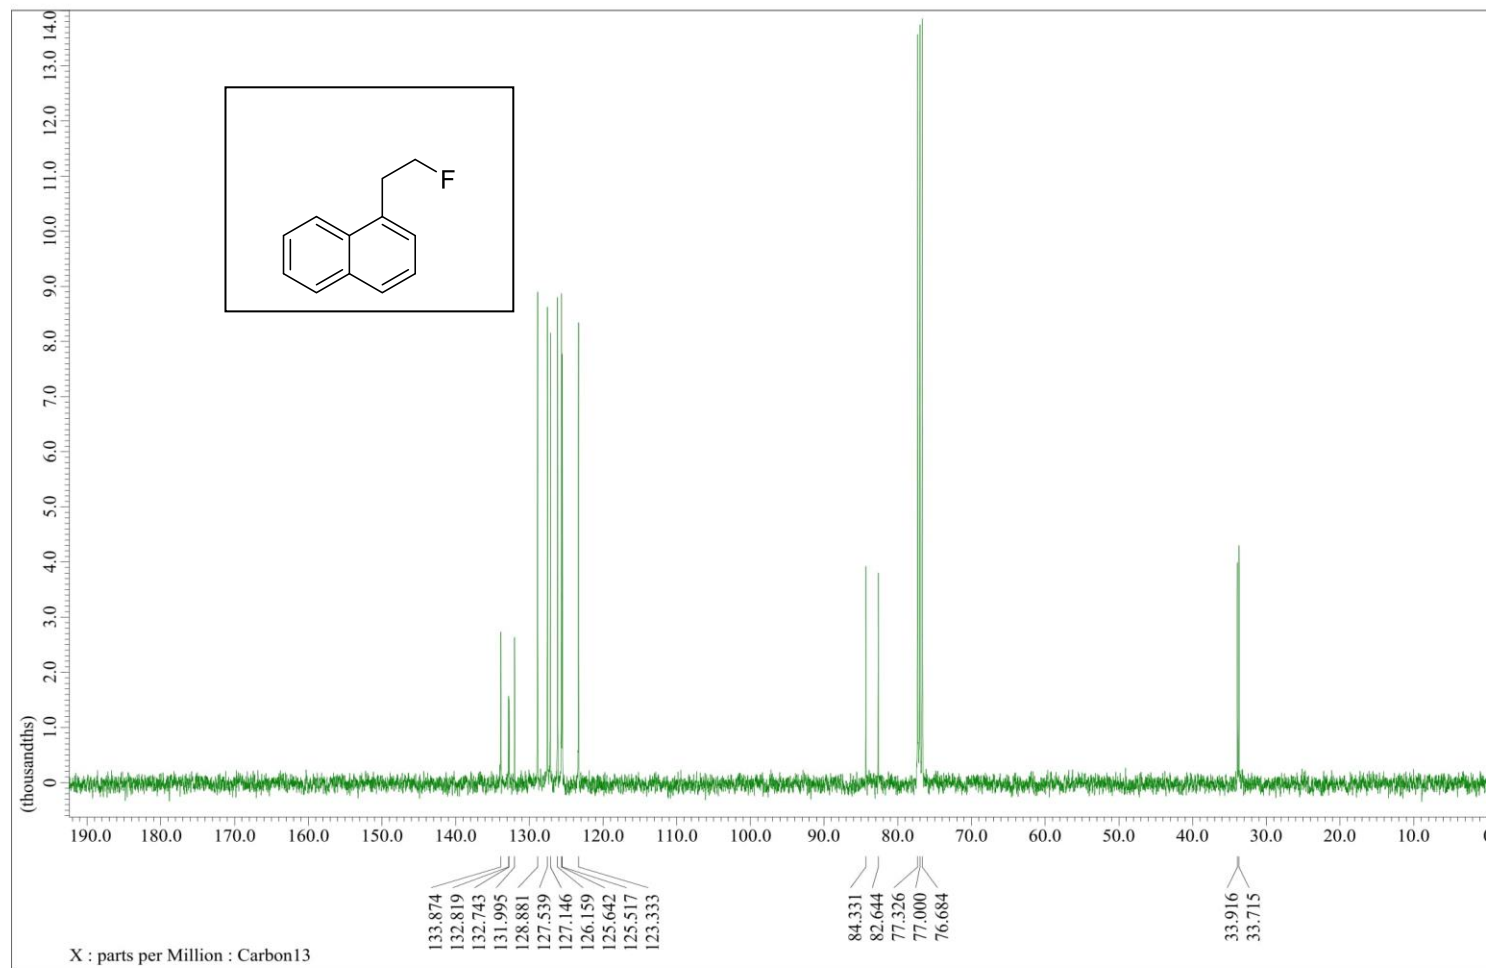

4-(3-fluoropropoxy)-2H-chromen-2-one (7).

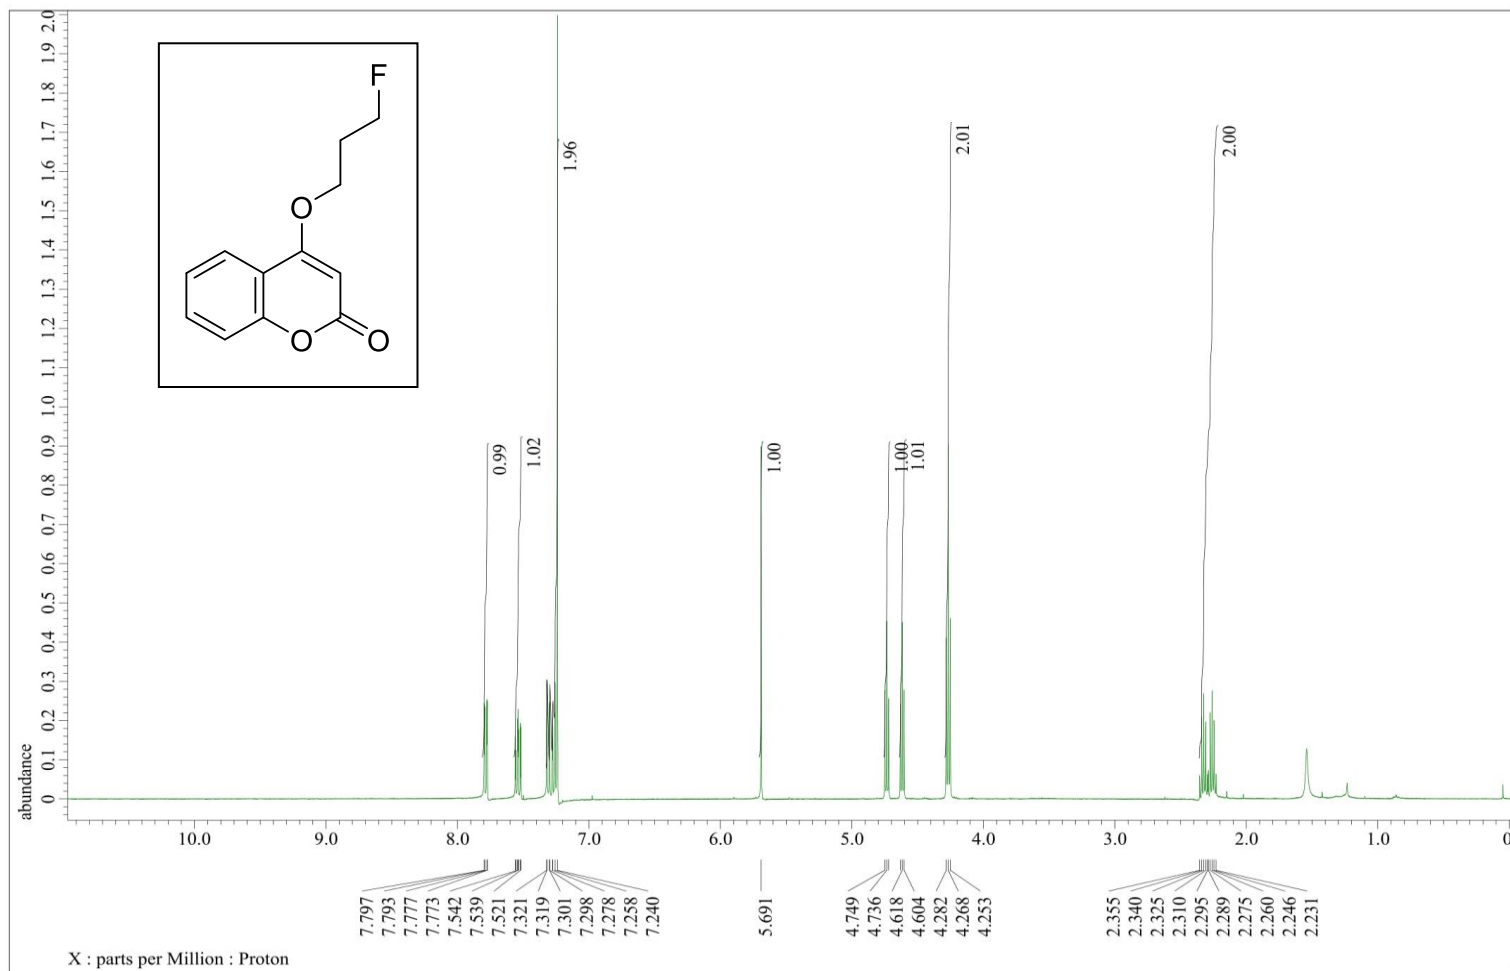

**4-(3-fluoropropoxy)-2H-chromen-2-one (7).**

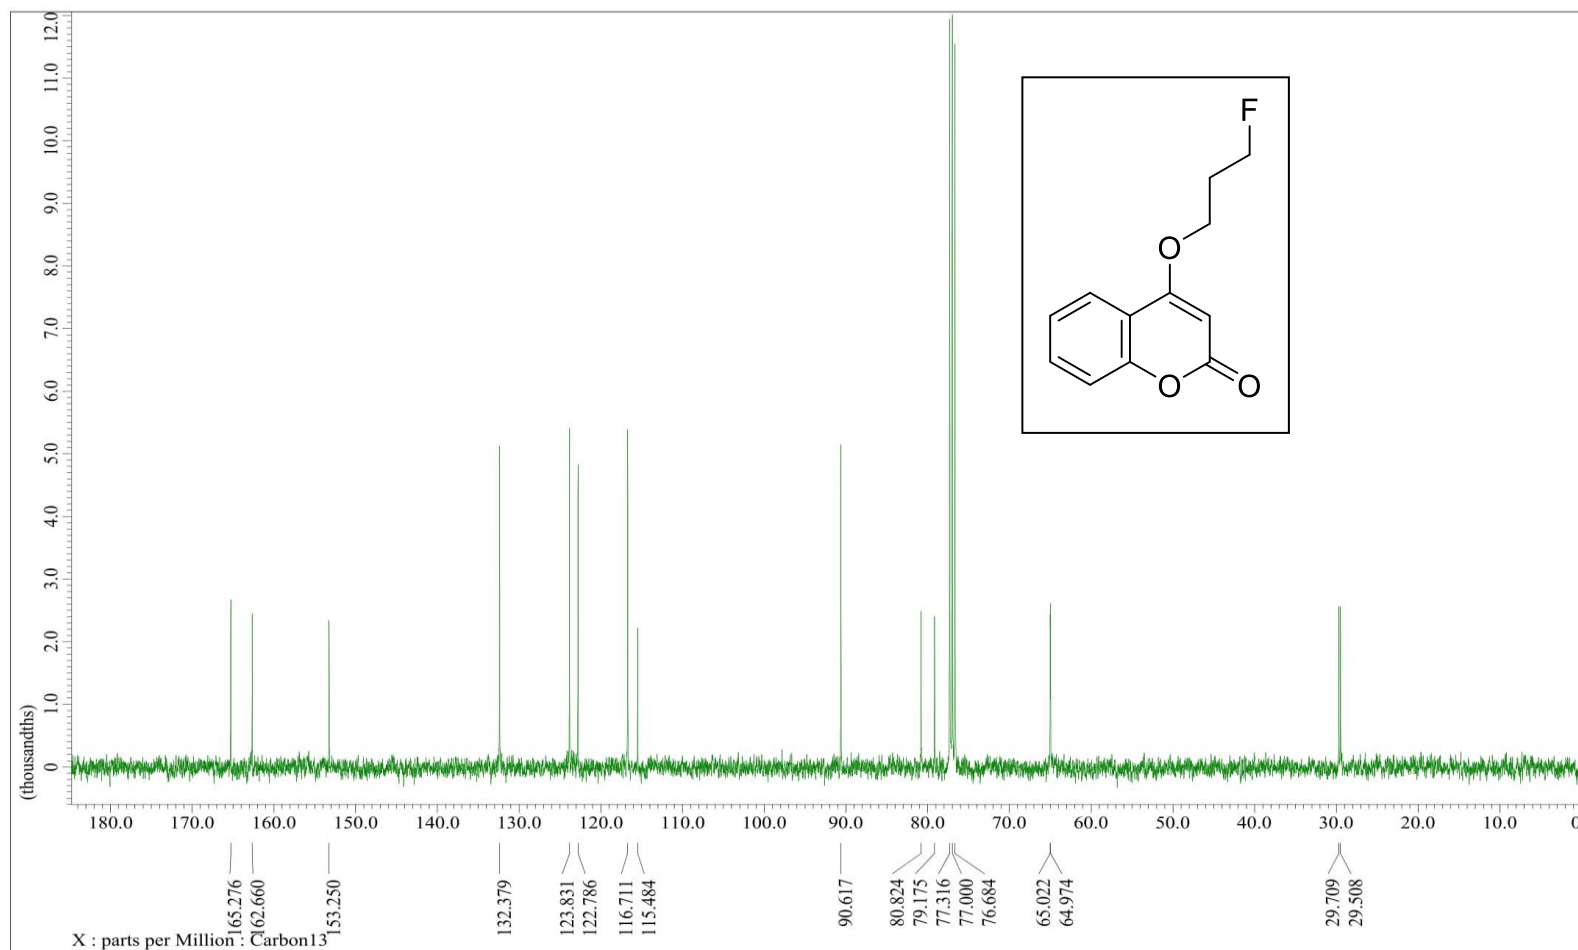

**1,17-difluoro-3,6,9,12,15-pentaoxaheptadecane (8).**

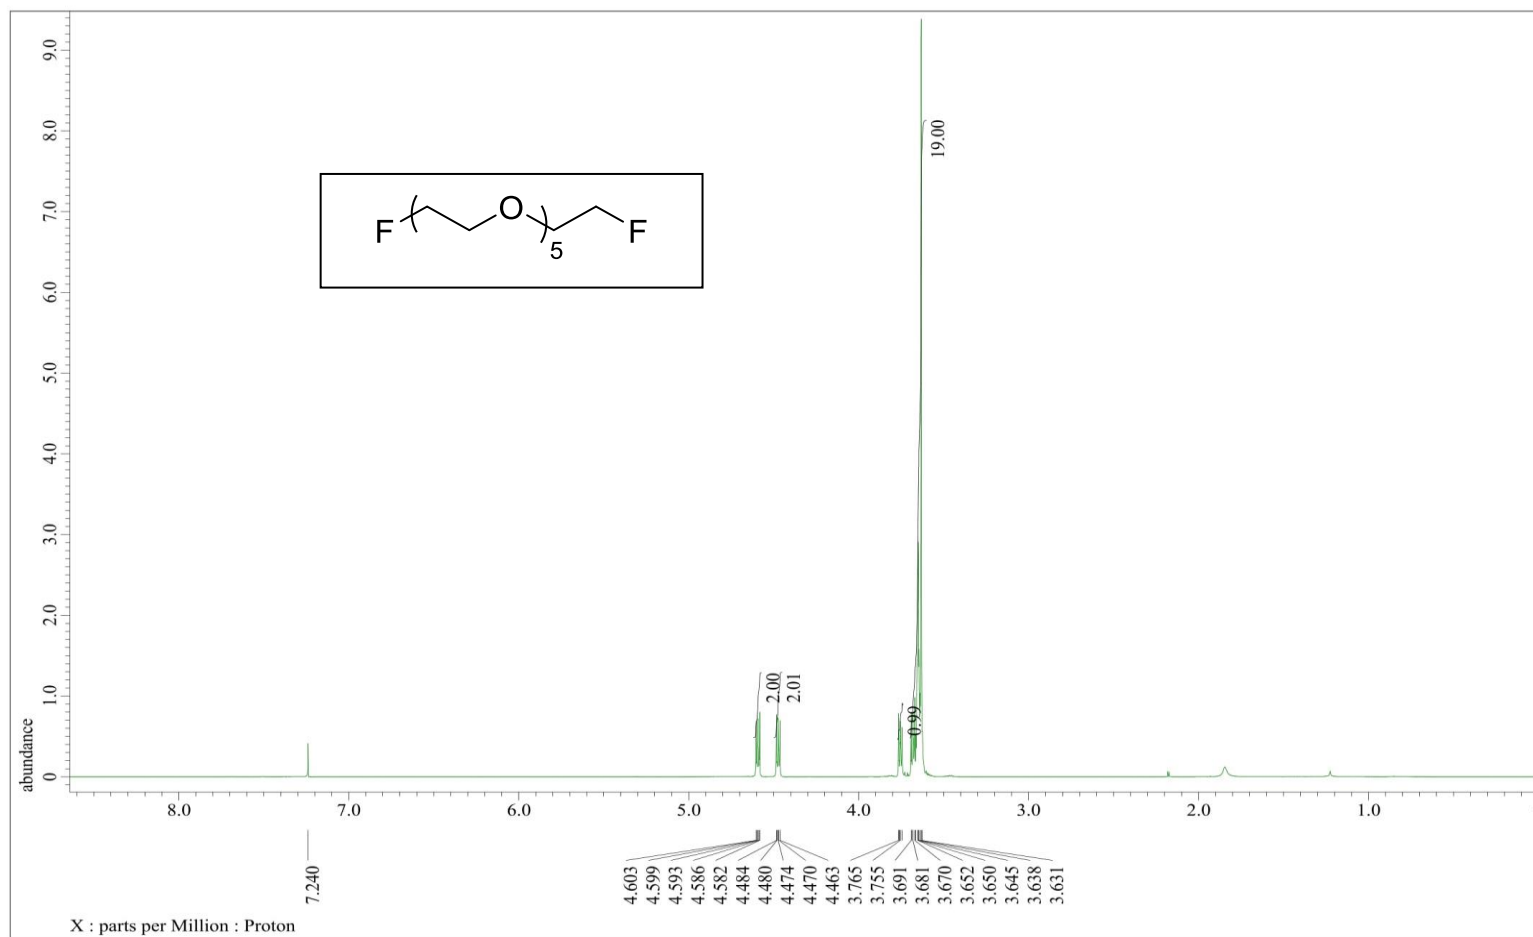

**1,17-difluoro-3,6,9,12,15-pentaoxaheptadecane (8).**

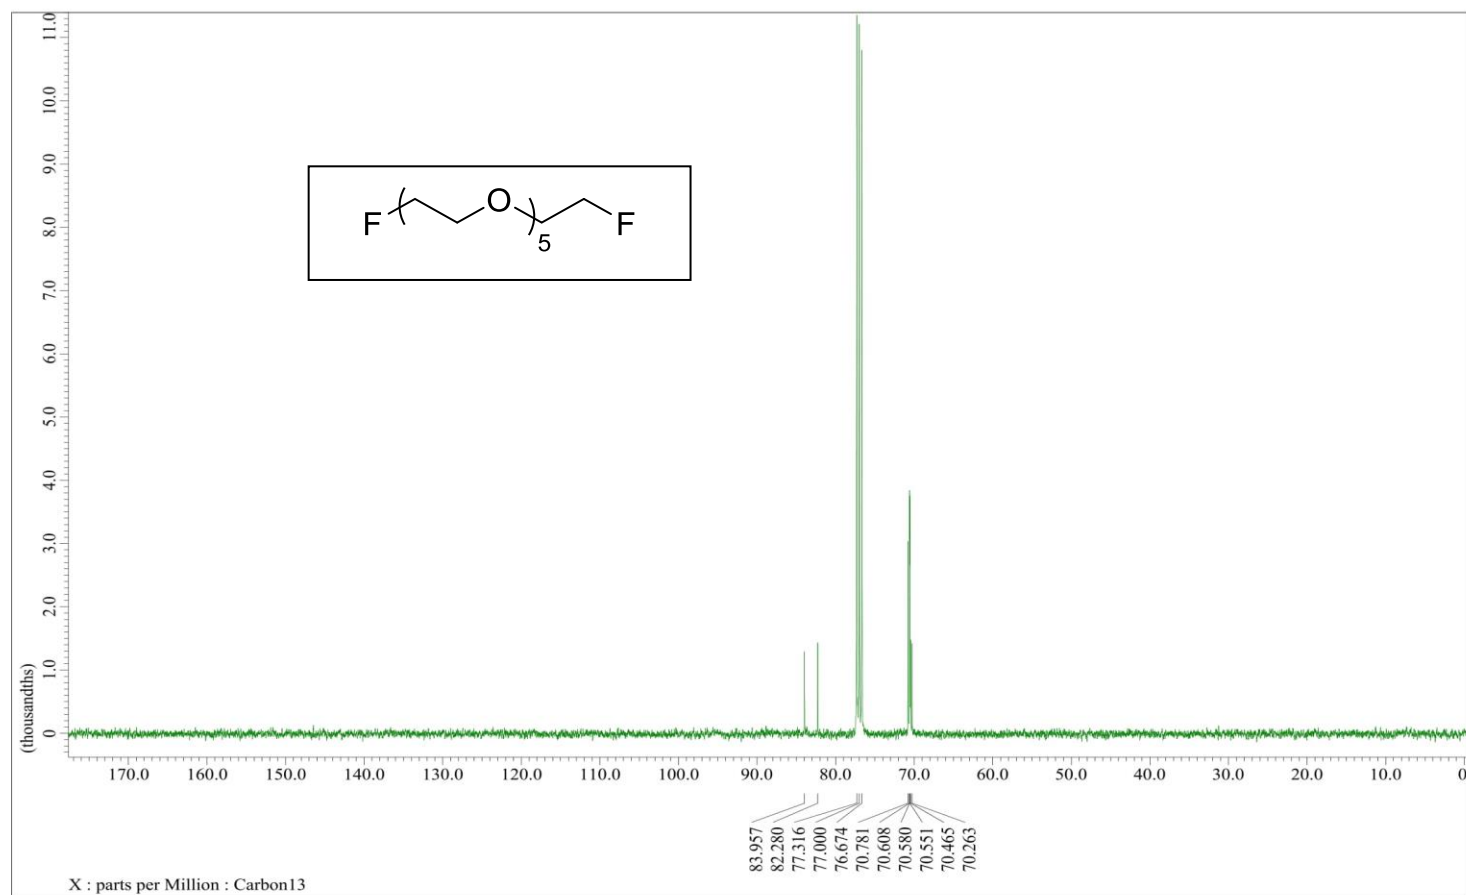

1-(3-fluoropropoxy)-4-nitrobenzene (9).

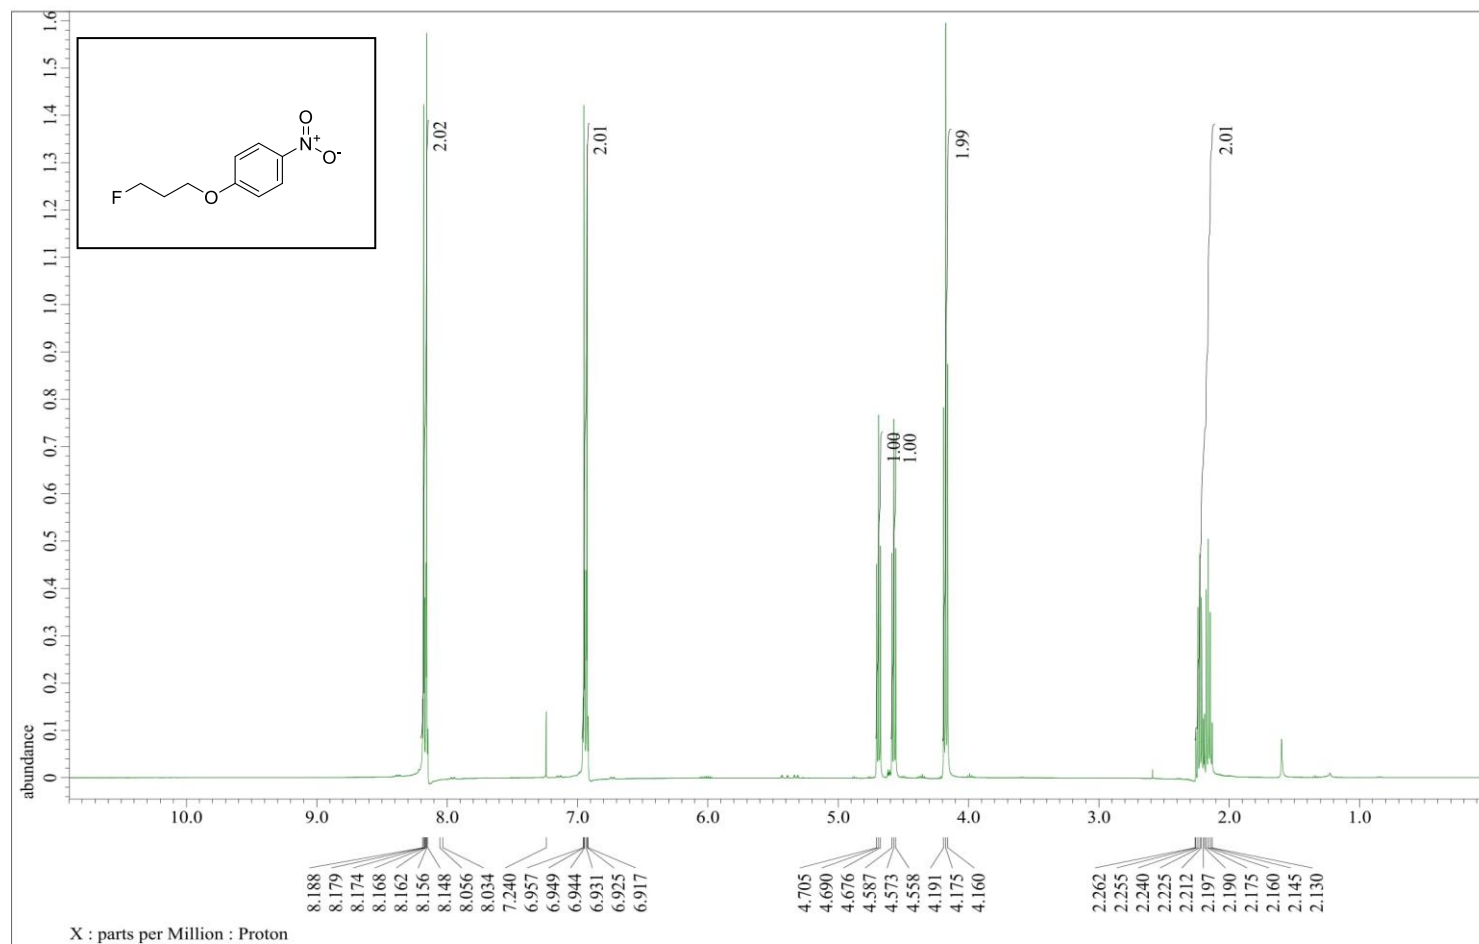



**1-(3-fluoropropoxy)-4-nitrobenzene (9).**

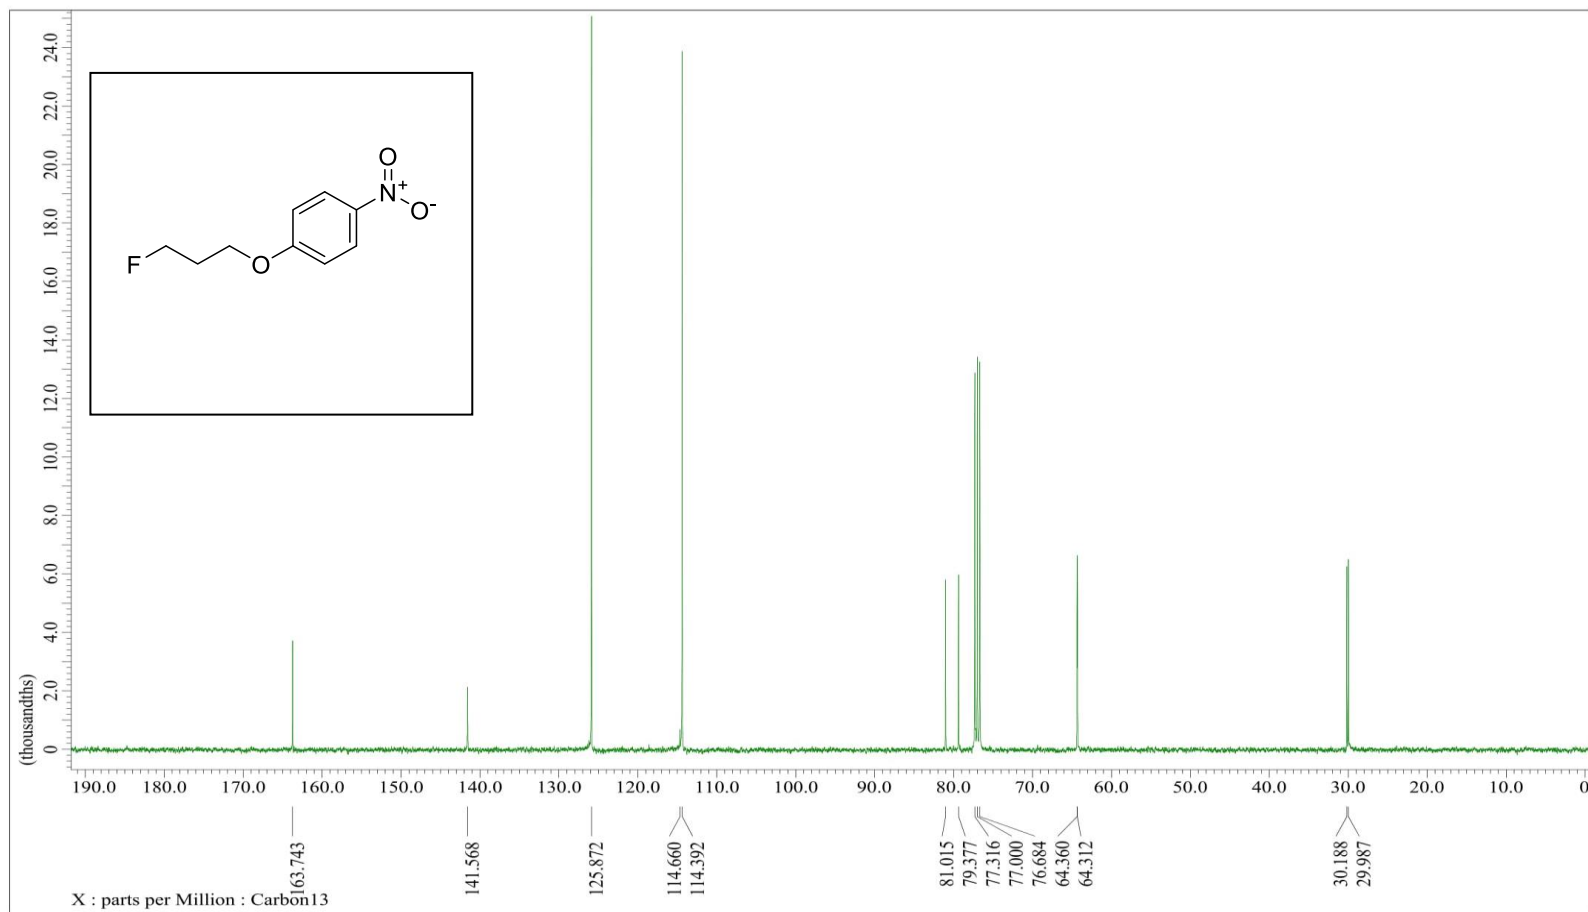

**1-(3-Fluoropropyl)-4-nitroimidazole (10).**

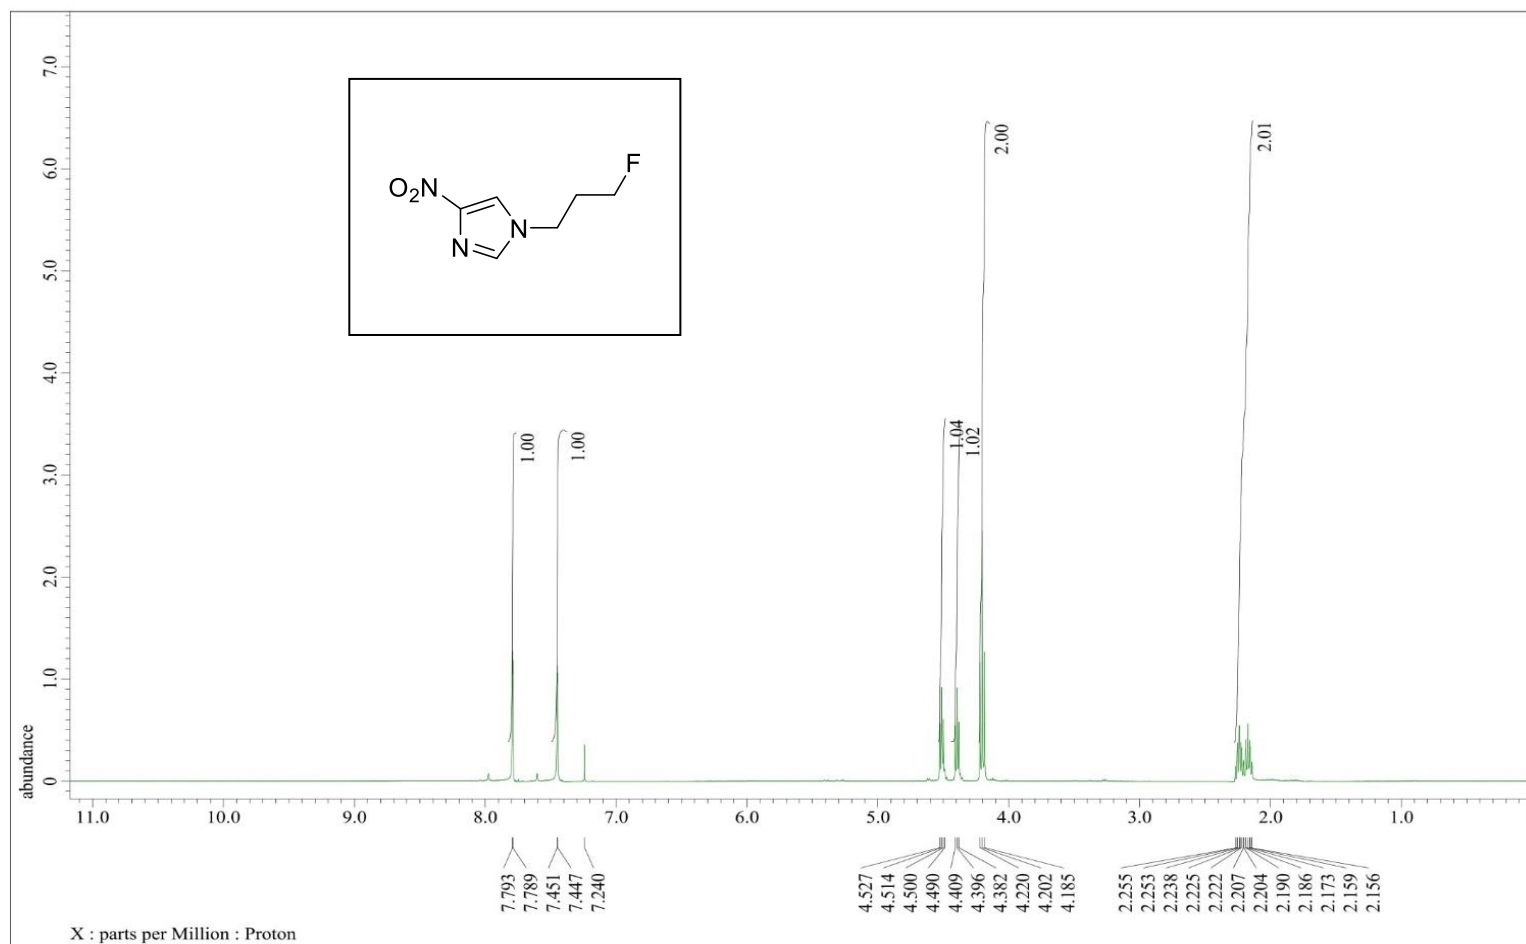

**1-(3-Fluoropropyl)-4-nitroimidazole (10).**

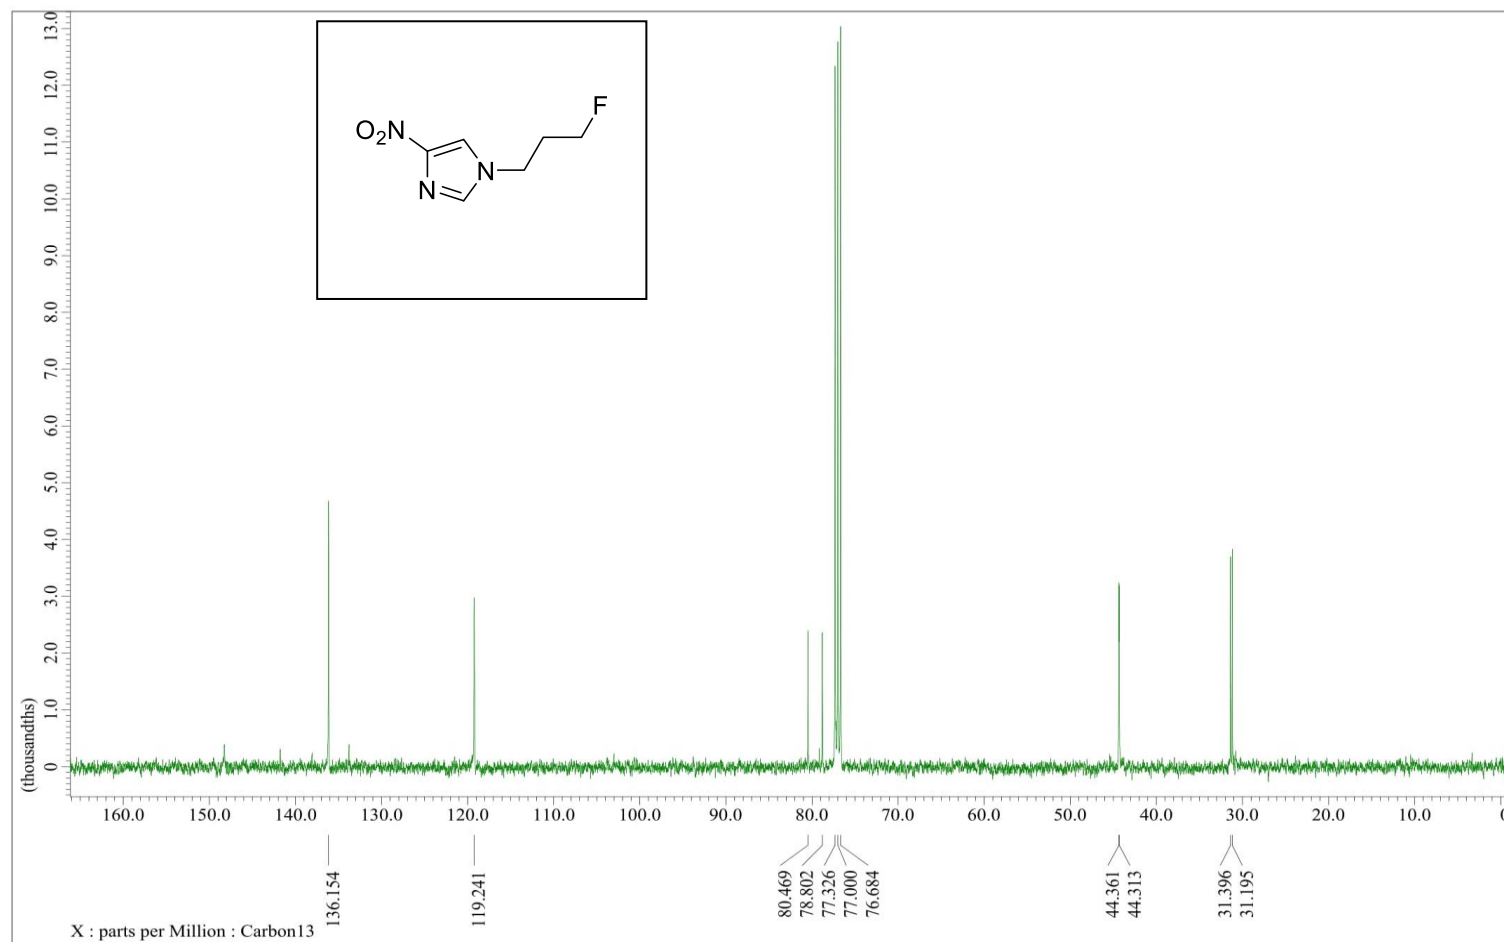

**1,2:3,4-Di-*O*-isopropylidene-6-fluoro-6-deoxy- $\alpha$ -D-galactopyranose (11).**

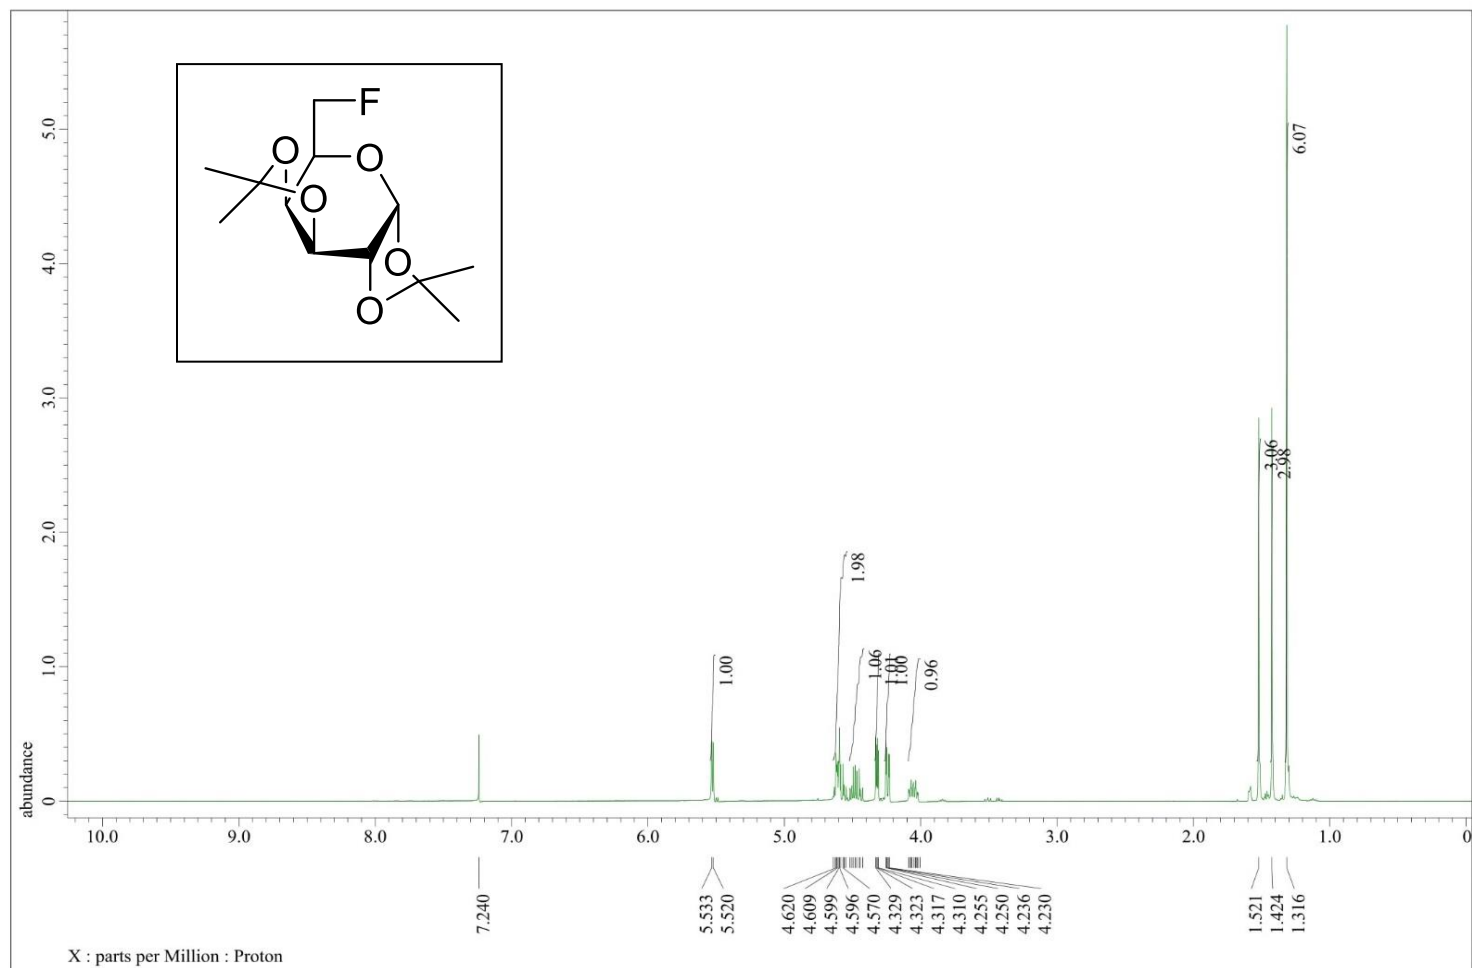

**1,2:3,4-Di-*O*-isopropylidene-6-fluoro-6-deoxy- $\alpha$ -D-galactopyranose (11).**

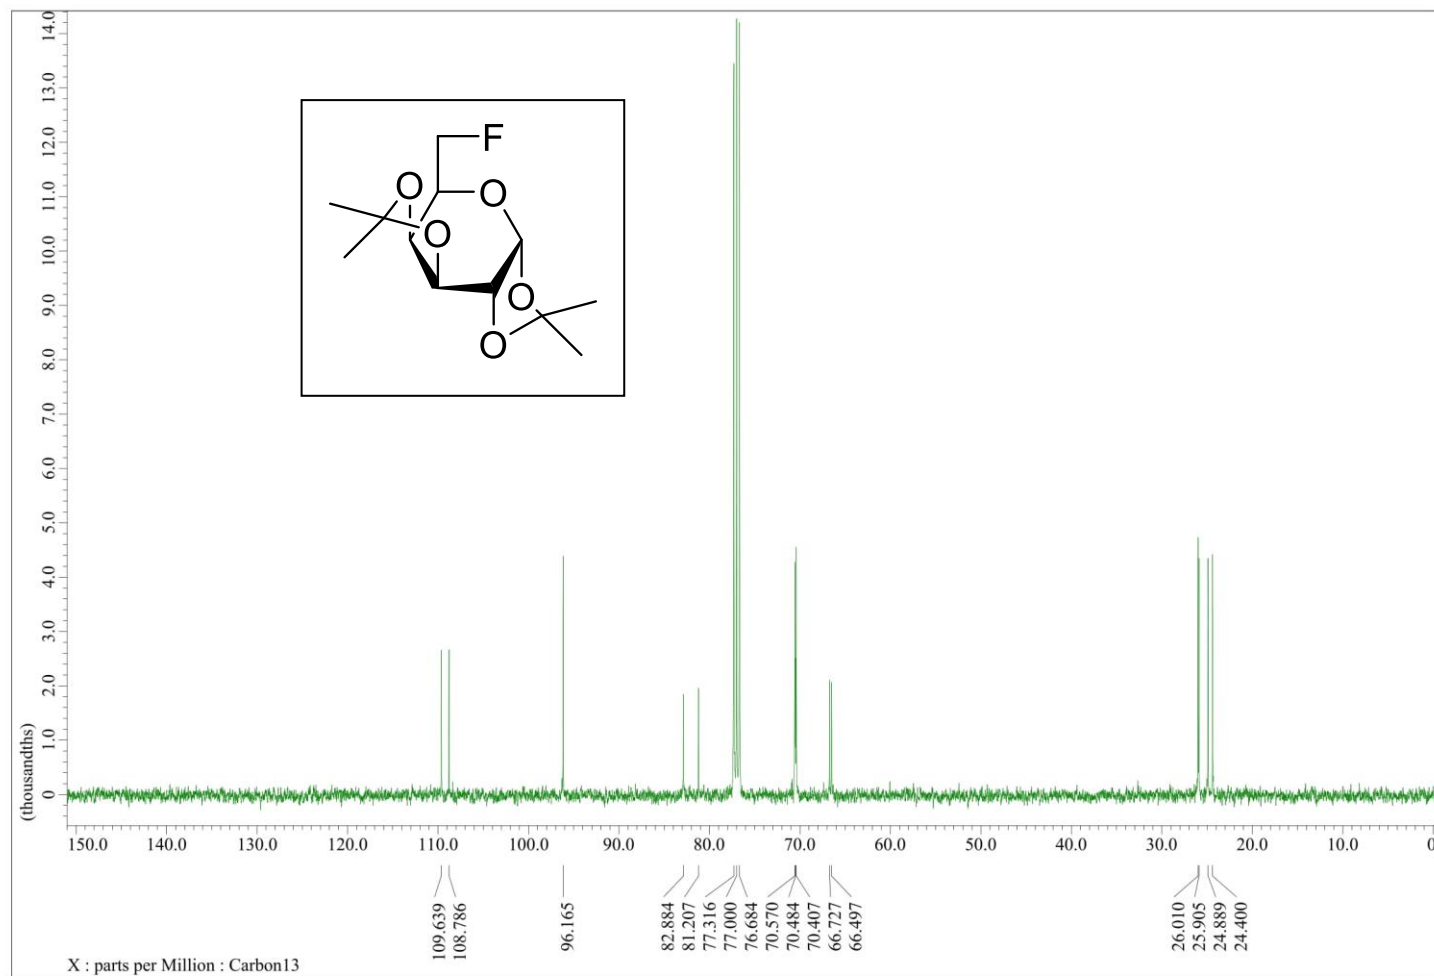

**3-Fluoro-picoline N-Oxide (14).**

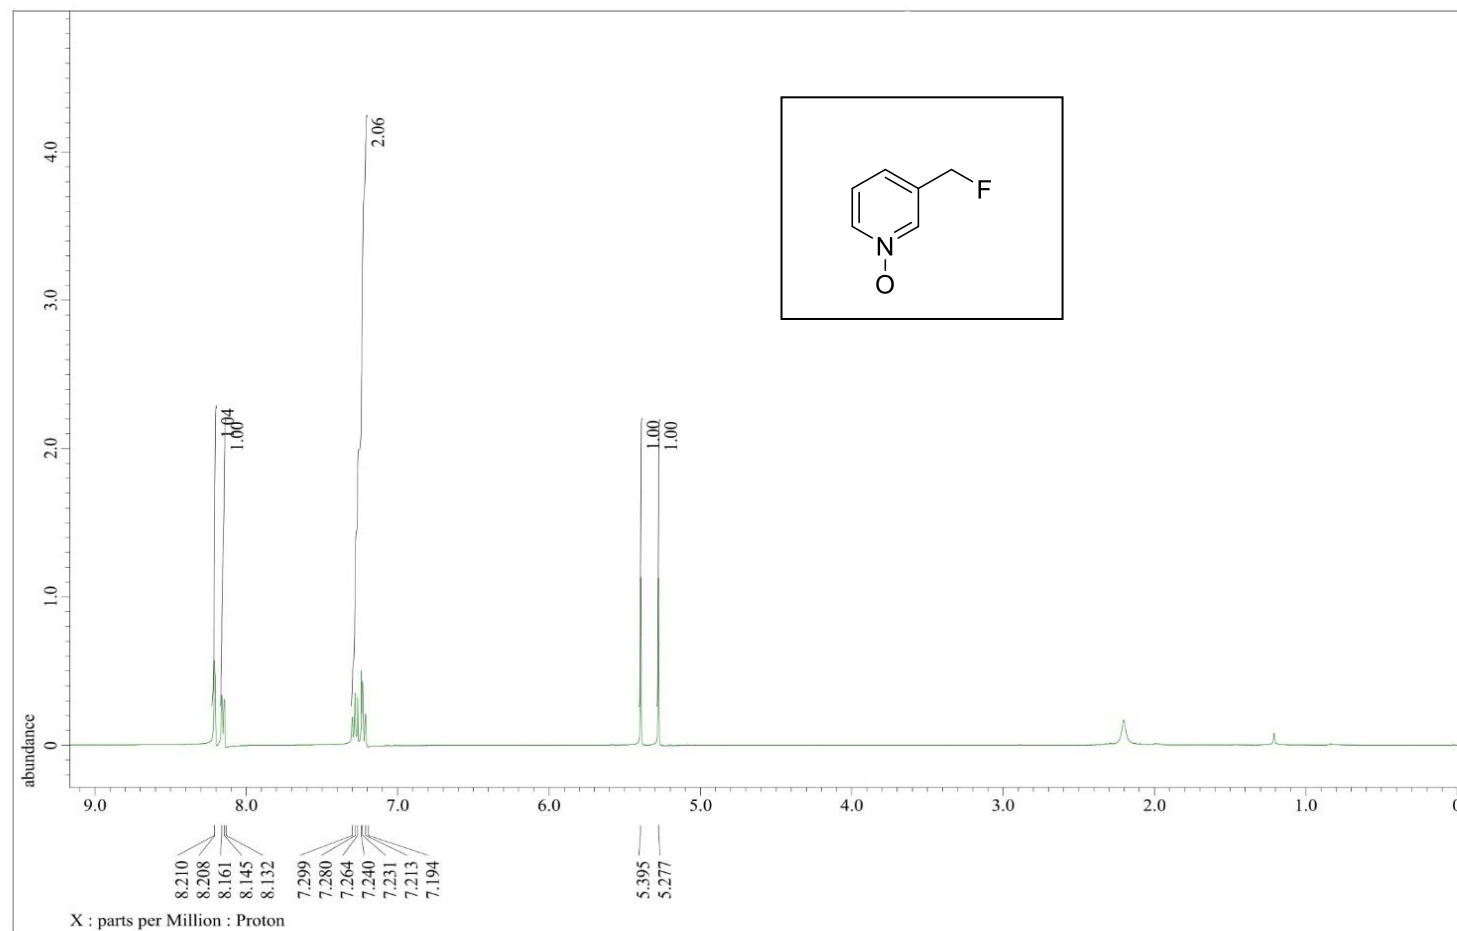

**3-Fluoro-picoline N-Oxide (14).**

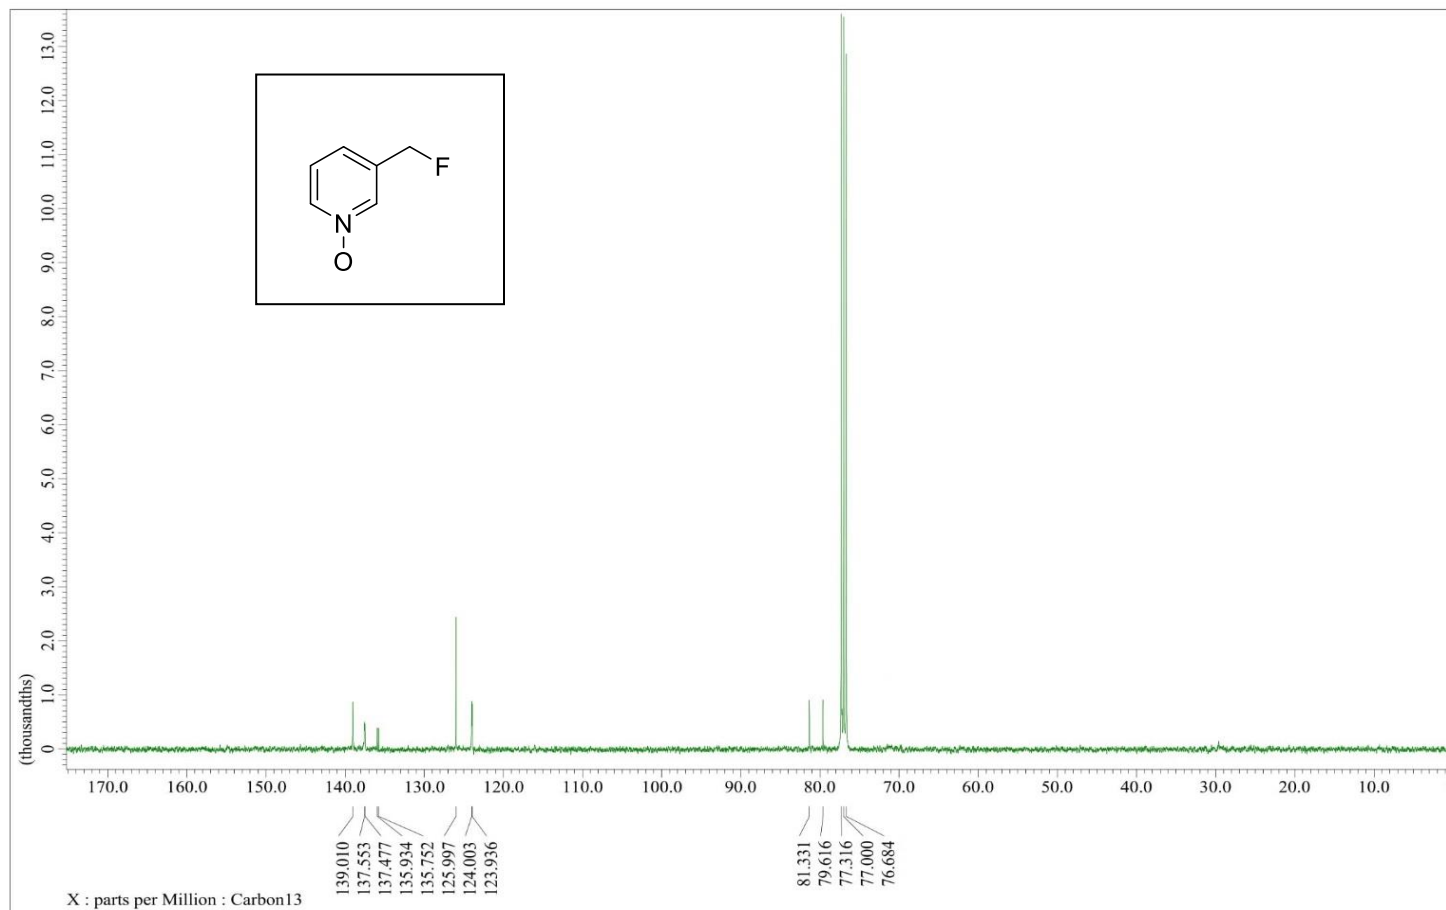

**2-Fluoro-2'-acetonaphthone (15).**

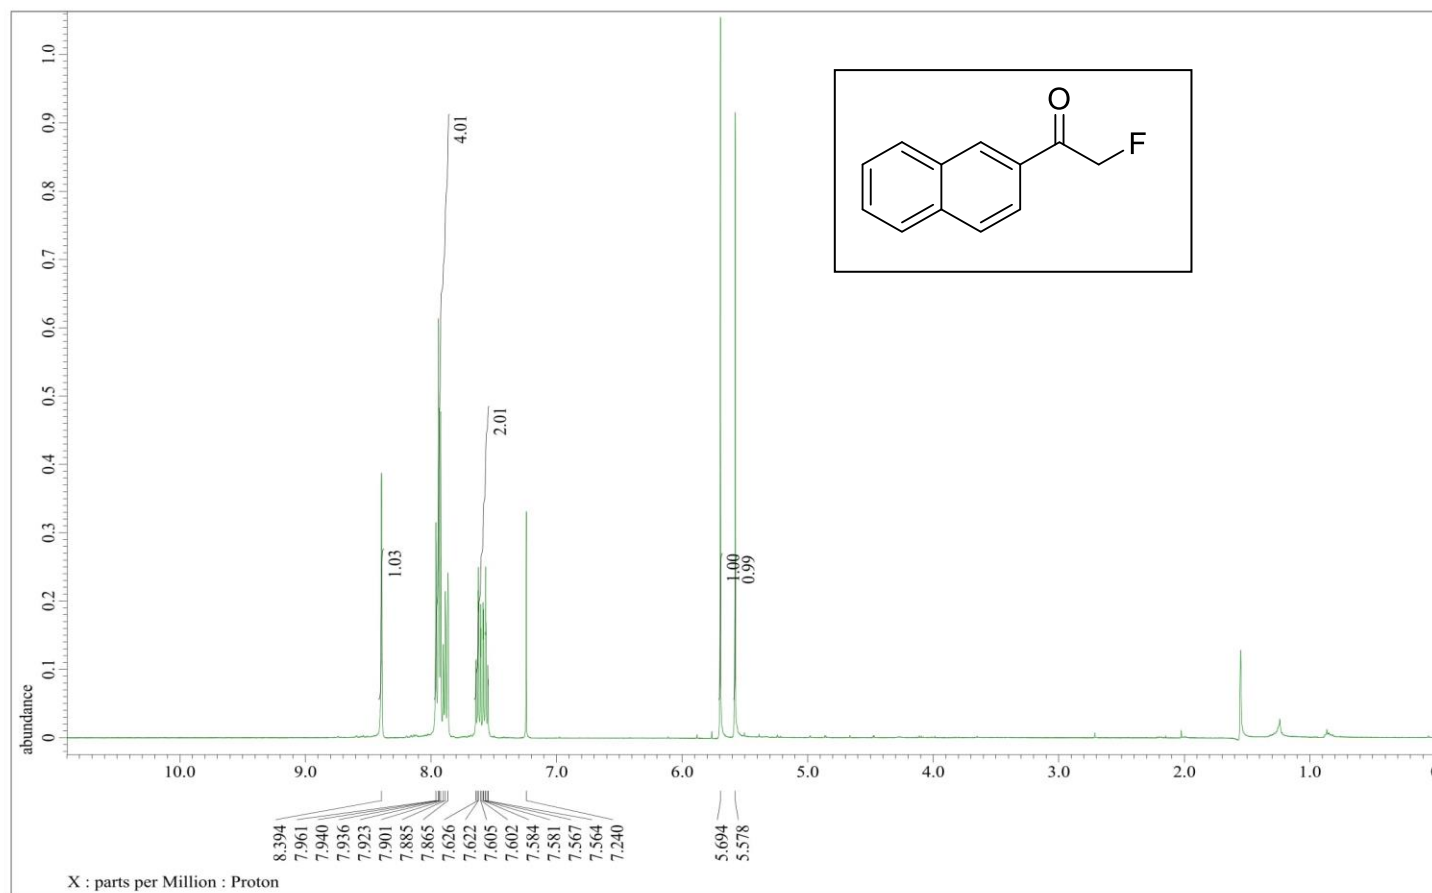



**2-Fluoro-2'-acetonaphthone (15).**

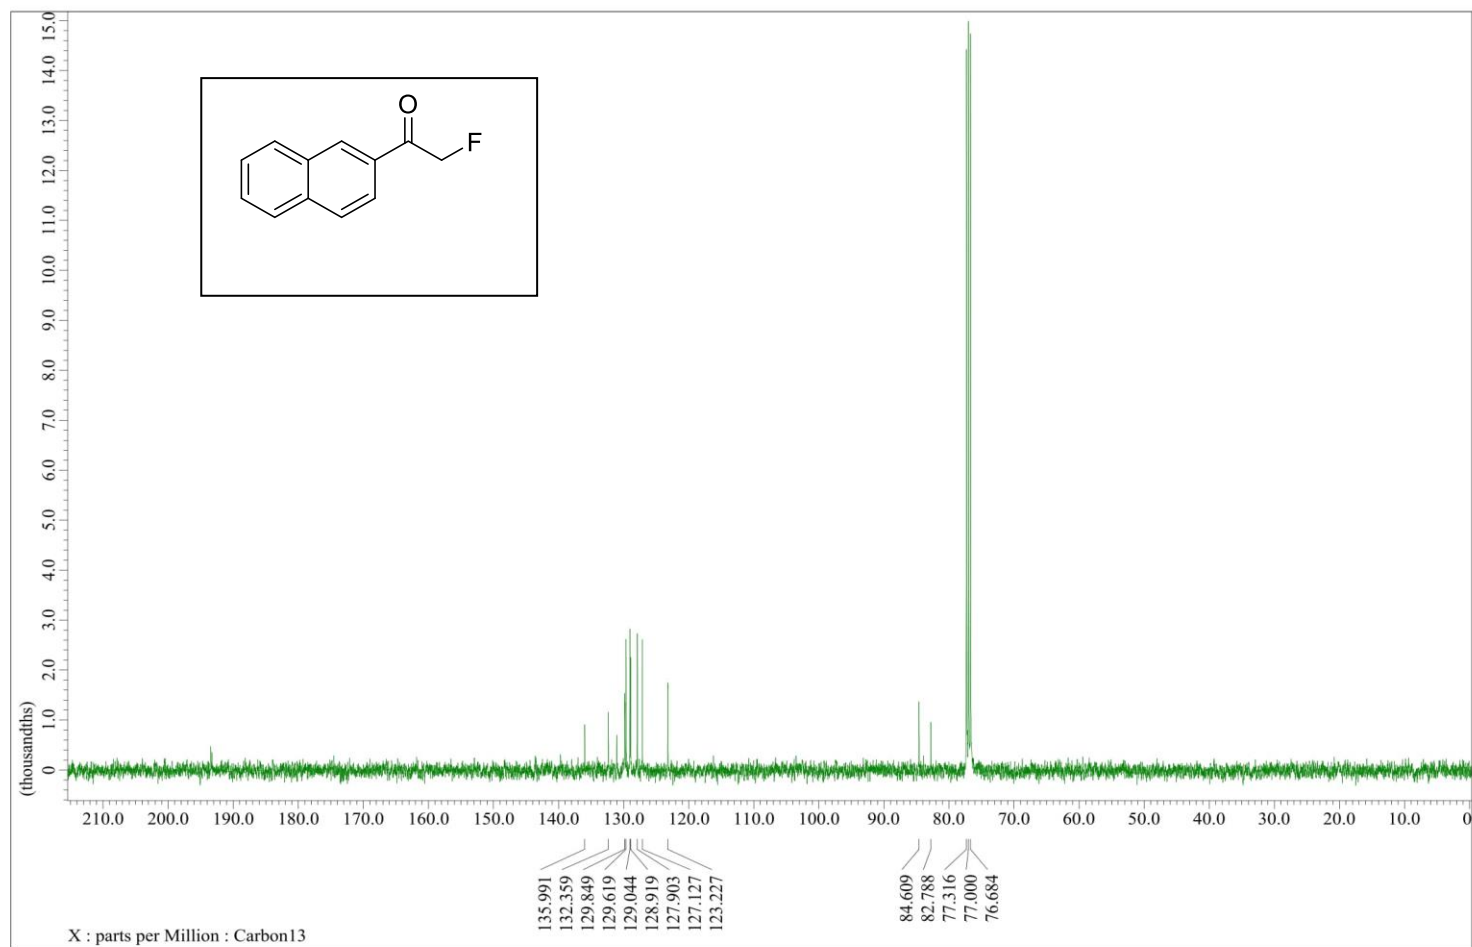

**3-O-(3-Fluoropropyl)estrone (16).**

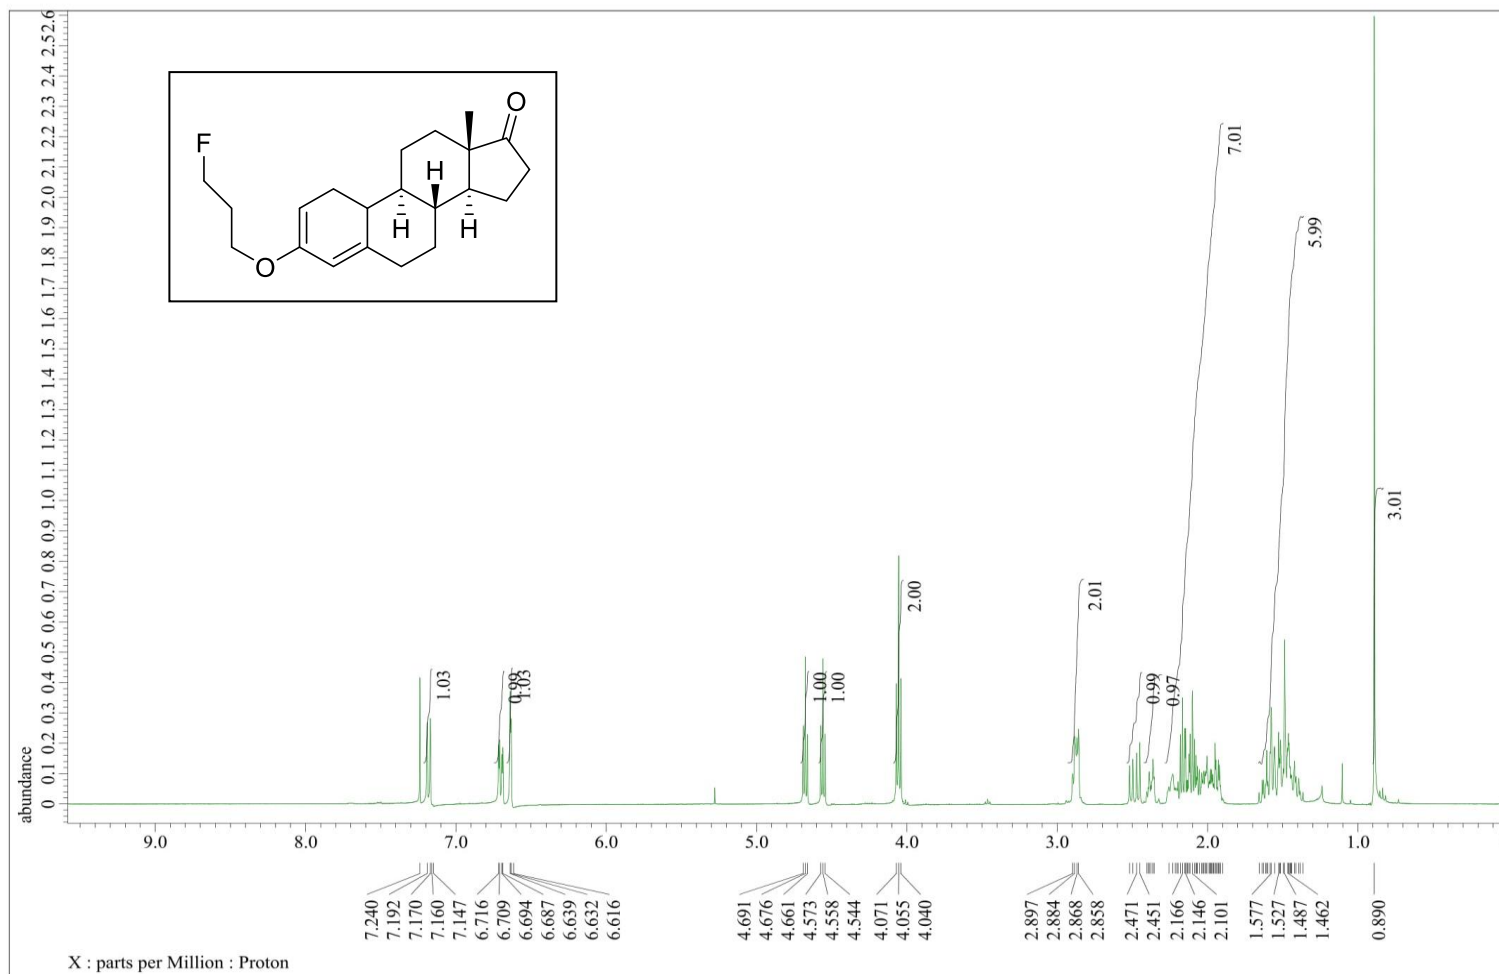

**3-O-(3-Fluoropropyl)estrone (16).**

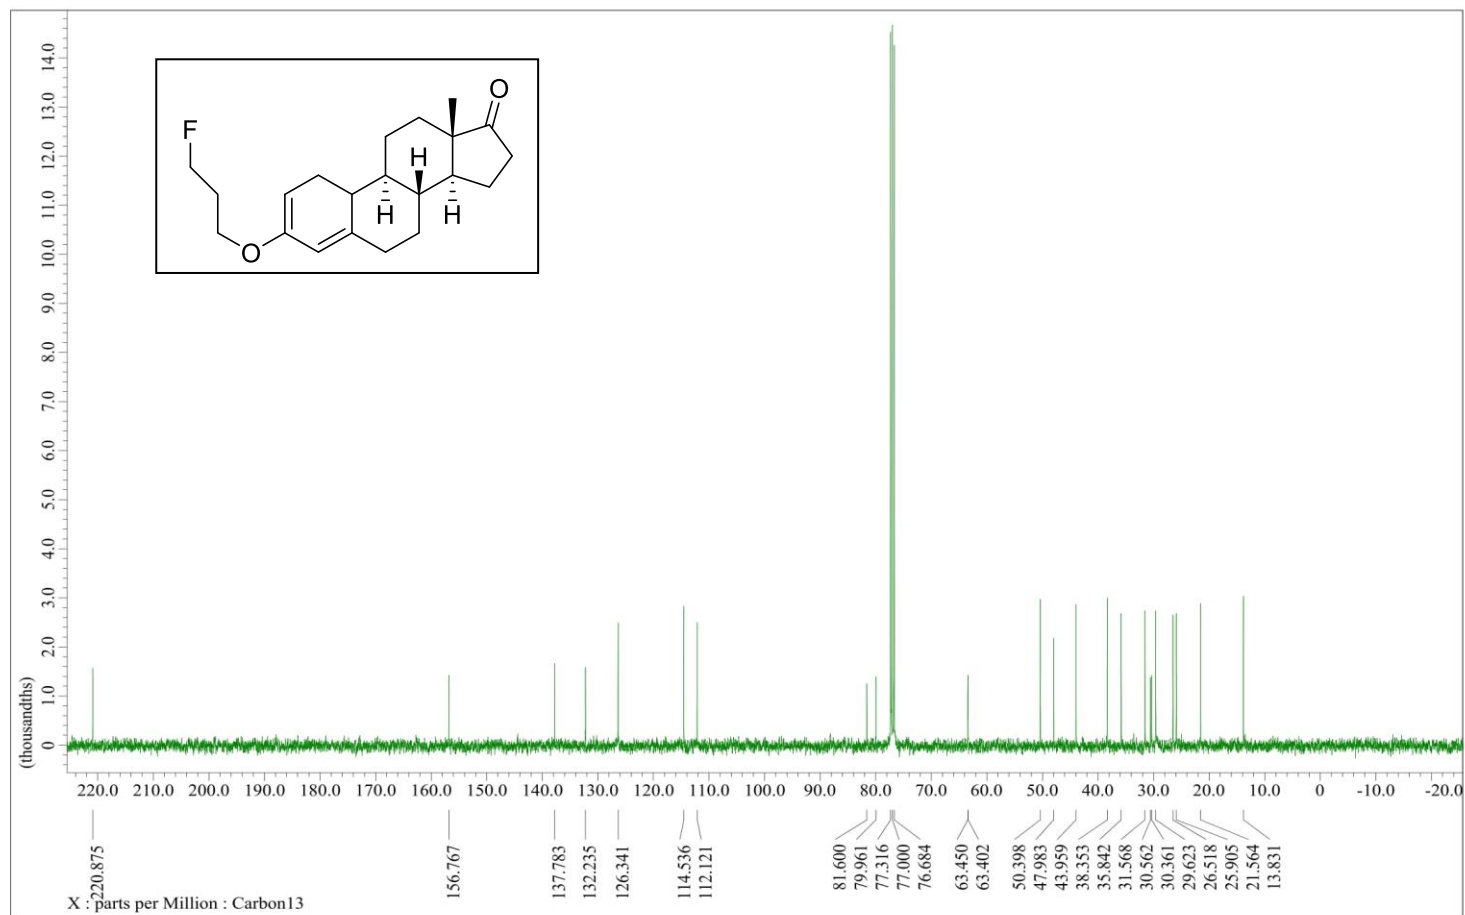

<sup>1</sup>H and <sup>13</sup>C NMR spectra of substrates.  
**2-(3-Methanesulfonyloxypropoxy)naphthalene (3).**

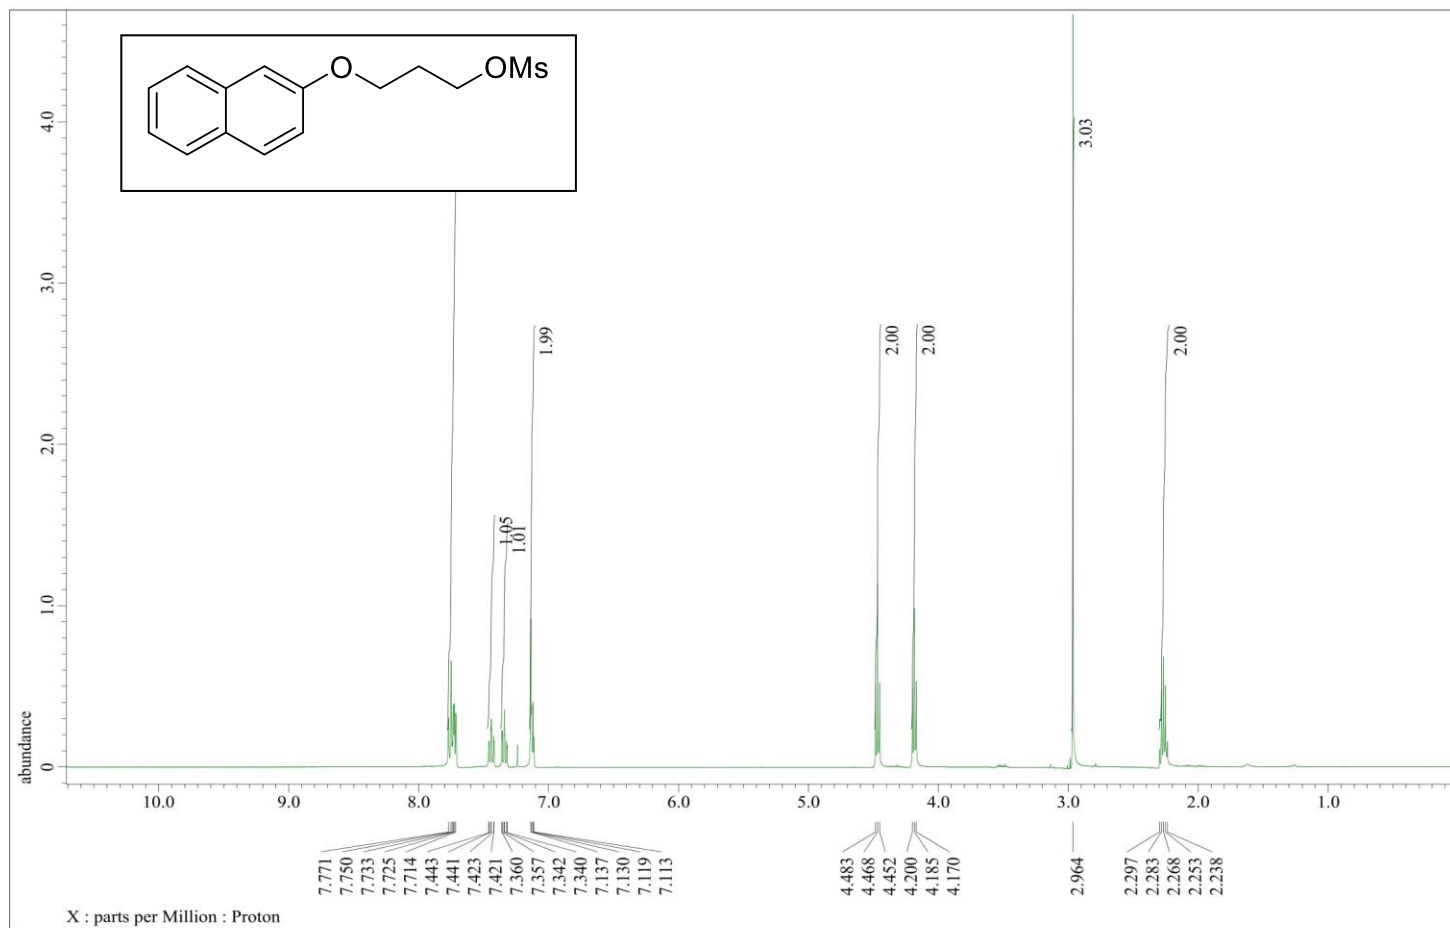

**2-(3-Methanesulfonyloxypropoxy)naphthalene (3).**

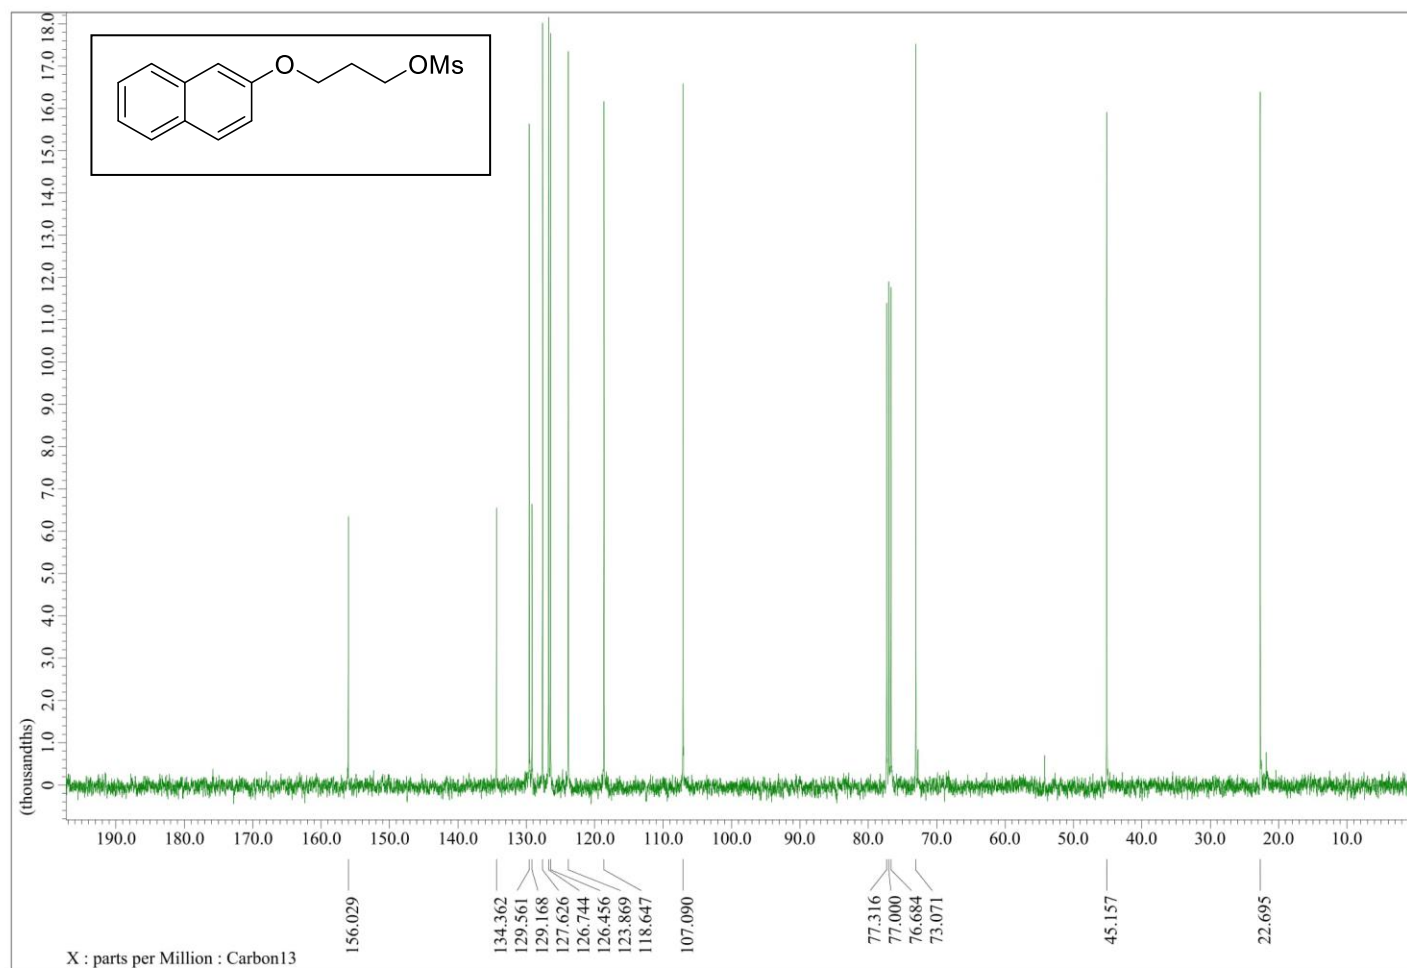

2-(2-Bromopropoxy)naphthalene (entry 1 and 2 in Table 2)

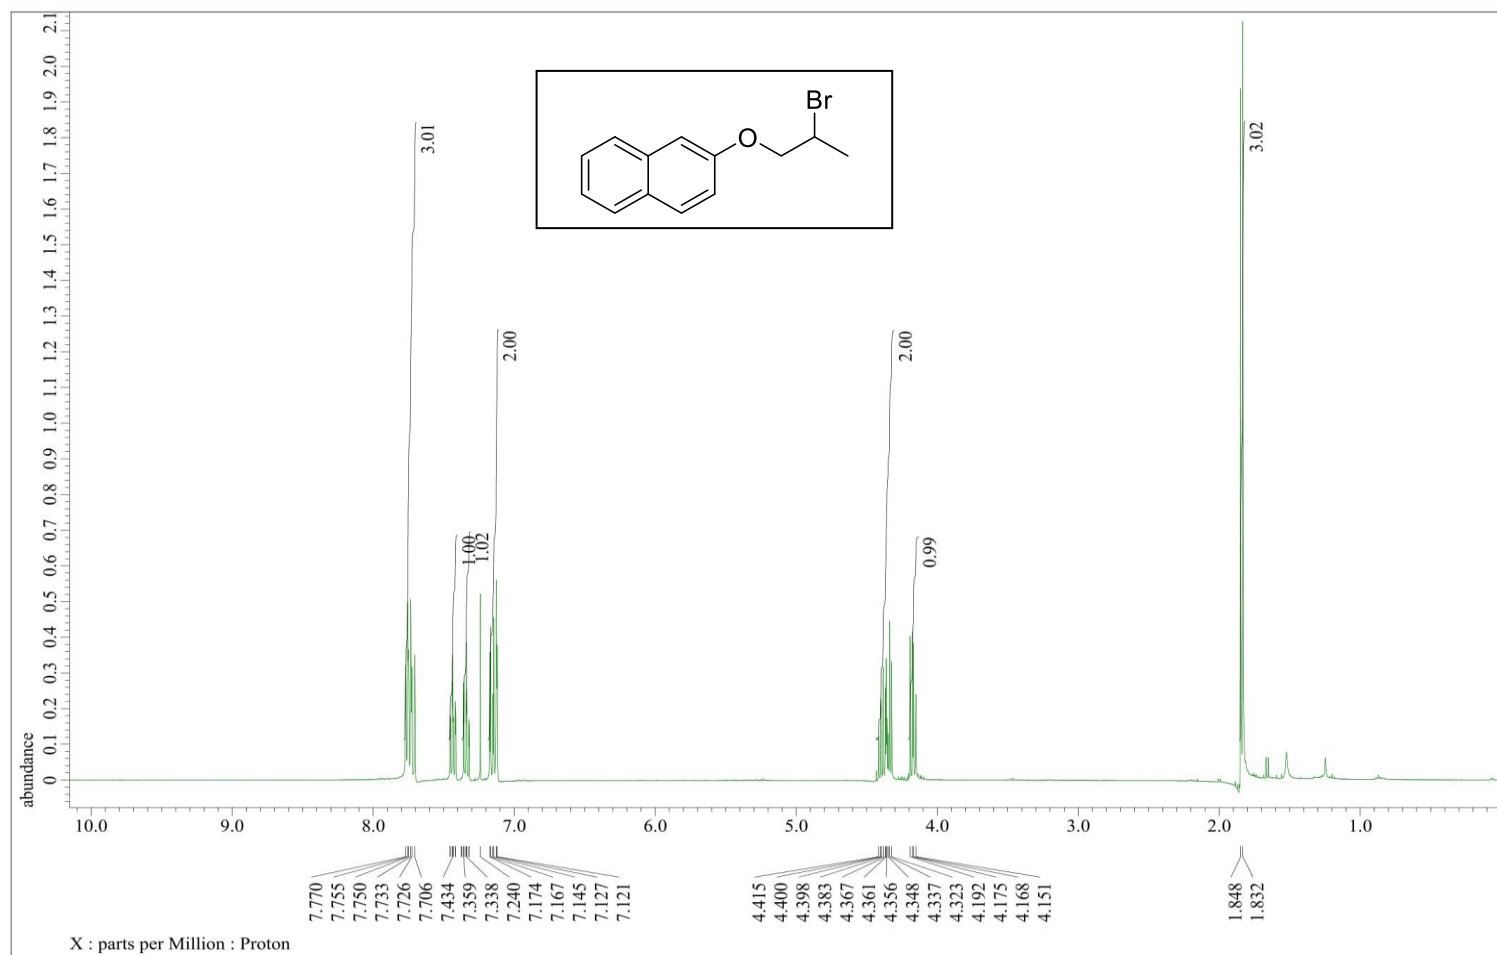

**2-(2-Bromopropoxy)naphthalene (entry 1 and 2 in Table 2)**

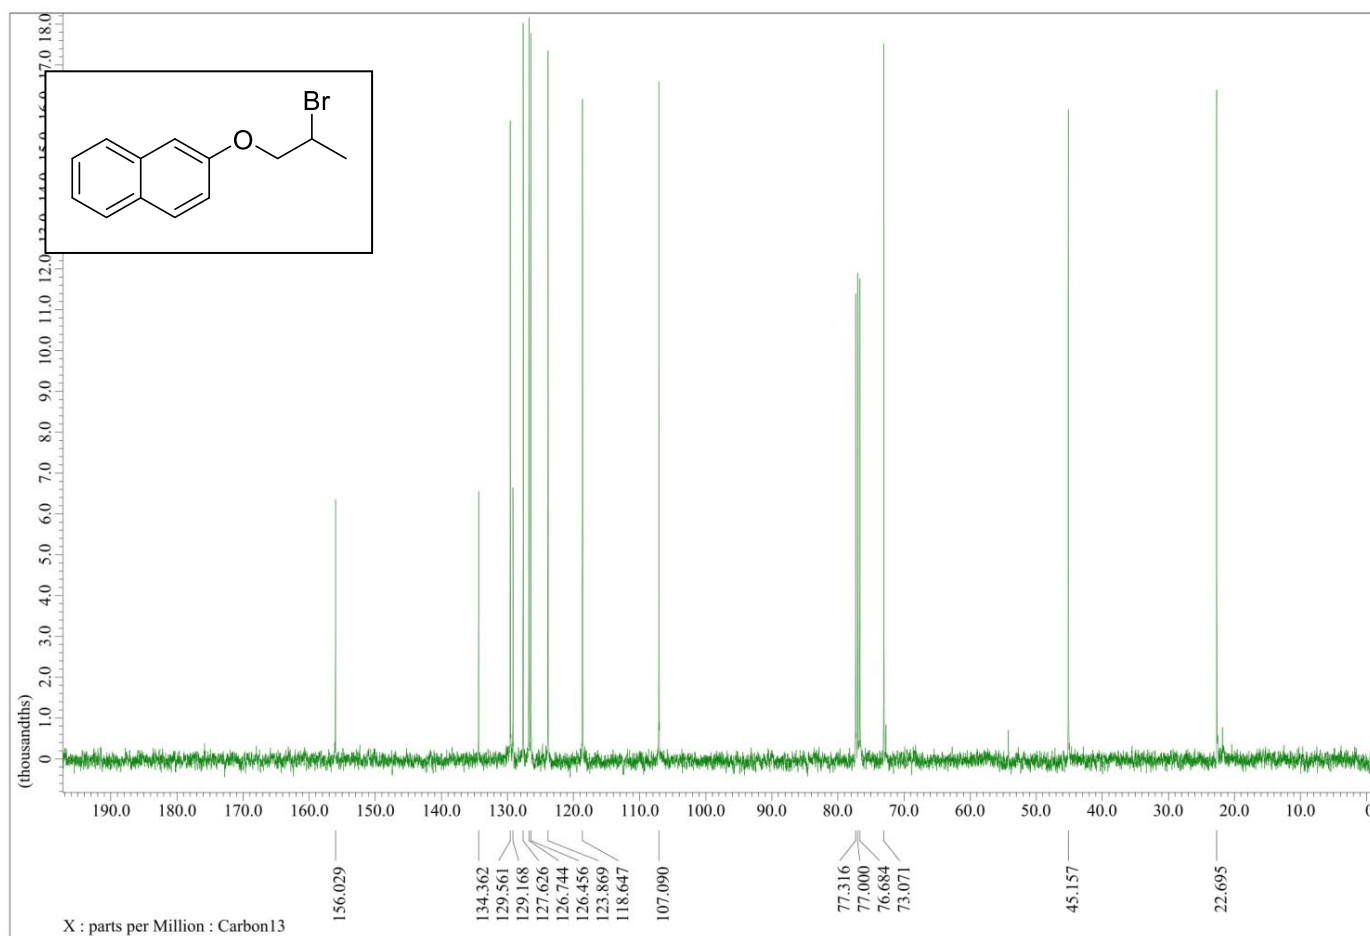

**1-(naphthalen-2-yloxy)propan-2-yl methanesulfonate (entry 2 and 3 in Table 2)**

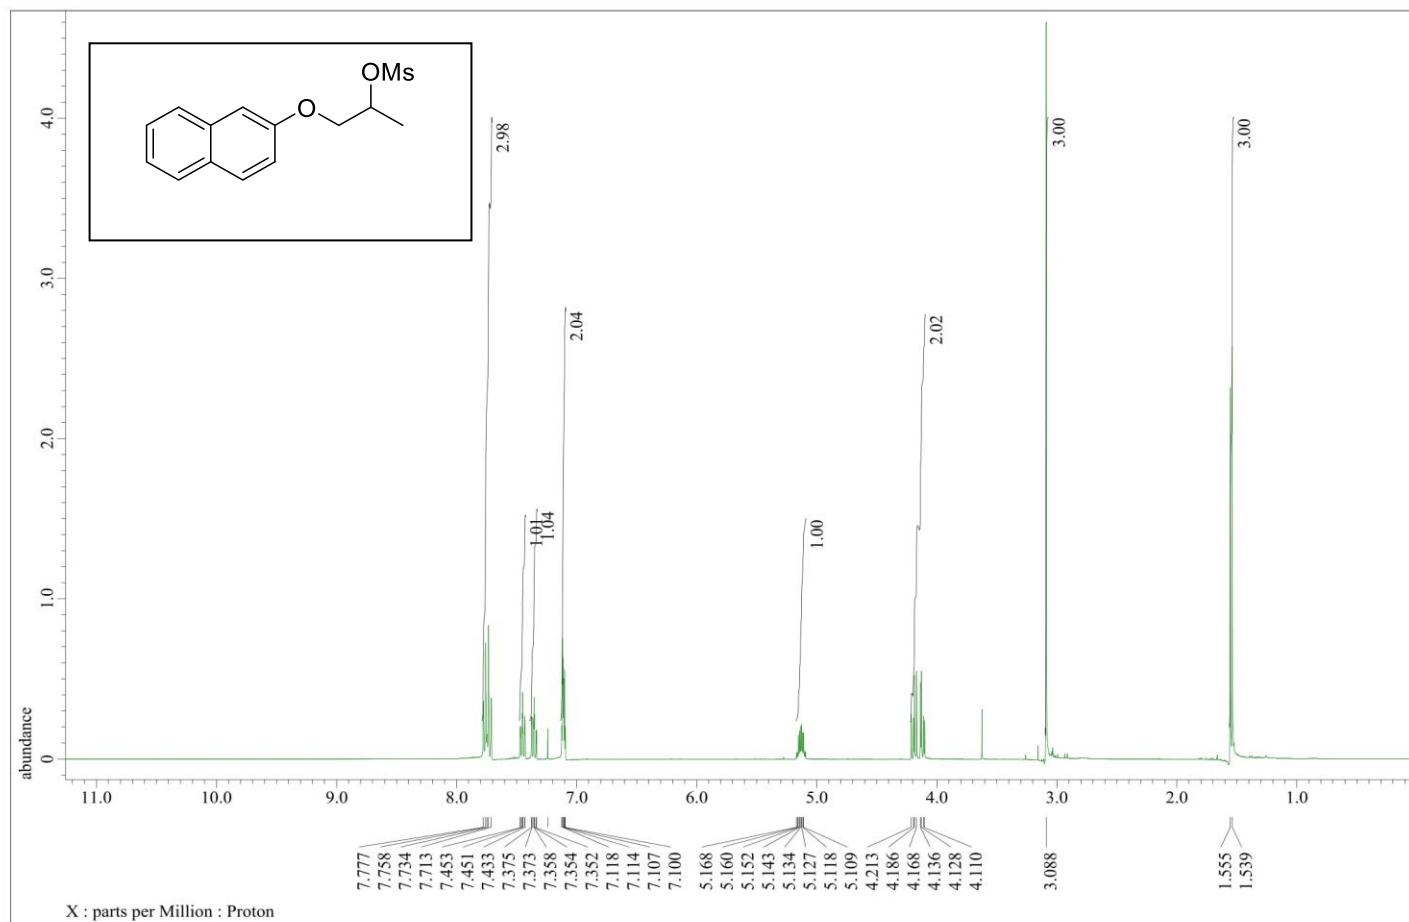



**1-(naphthalen-2-yloxy)propan-2-yl methanesulfonate (entry 2 and 3 in Table 2)**

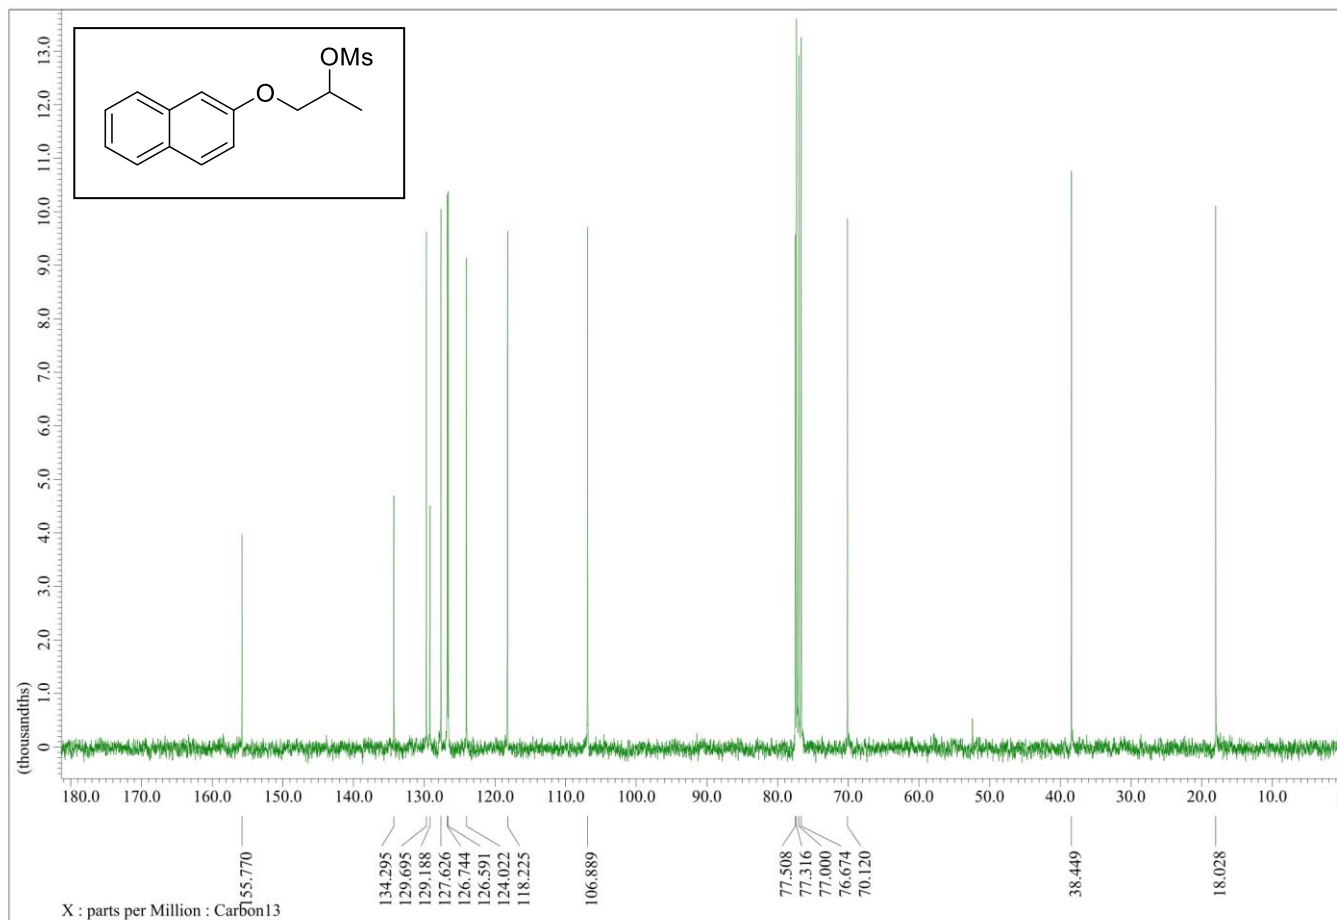

**1-(2-Methanesulfonylethyl)naphthalene (entry 5 and 6 in Table 2)**

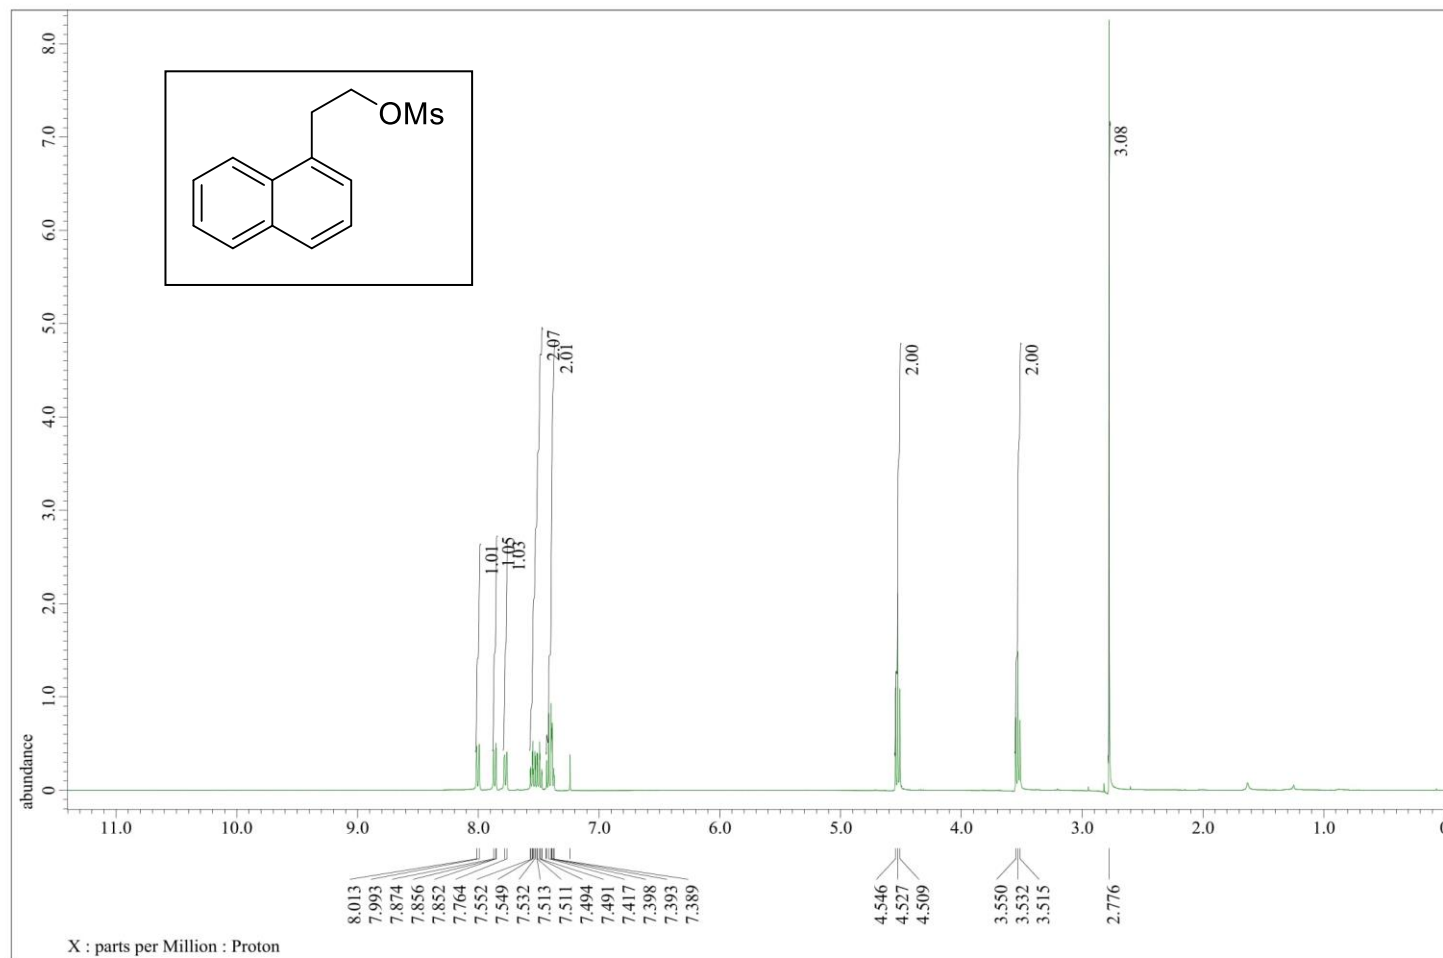

**1-(2-Methanesulfonylethyl)naphthalene (entry 5 and 6 in Table 2)**

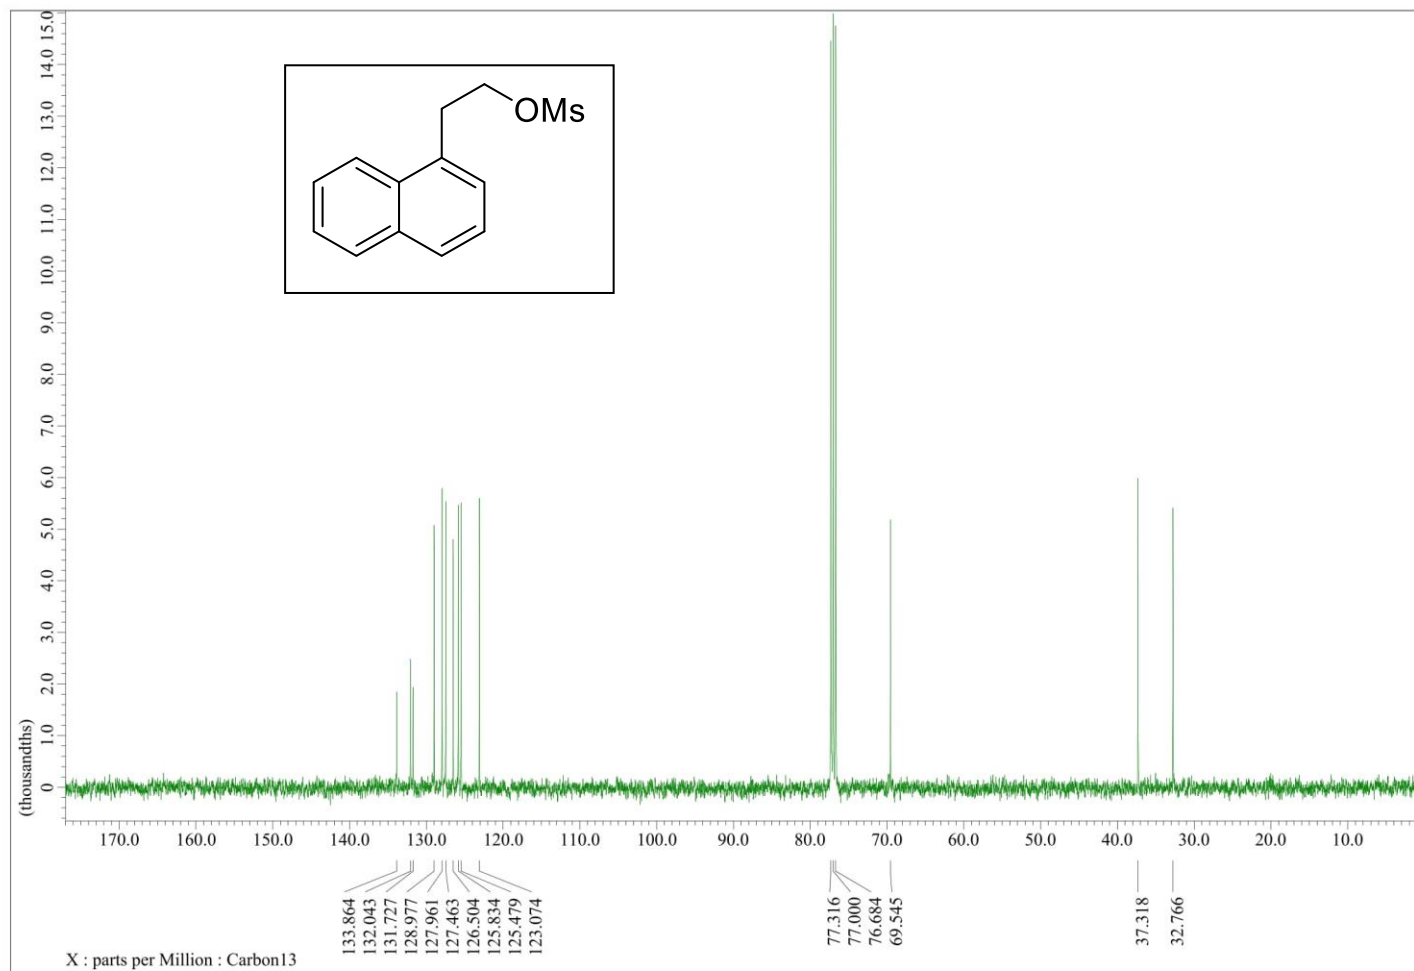

**1,17-dibromo-3,6,9,12,15-pentaoxaheptadecane ( entry 10 in Table 2)**

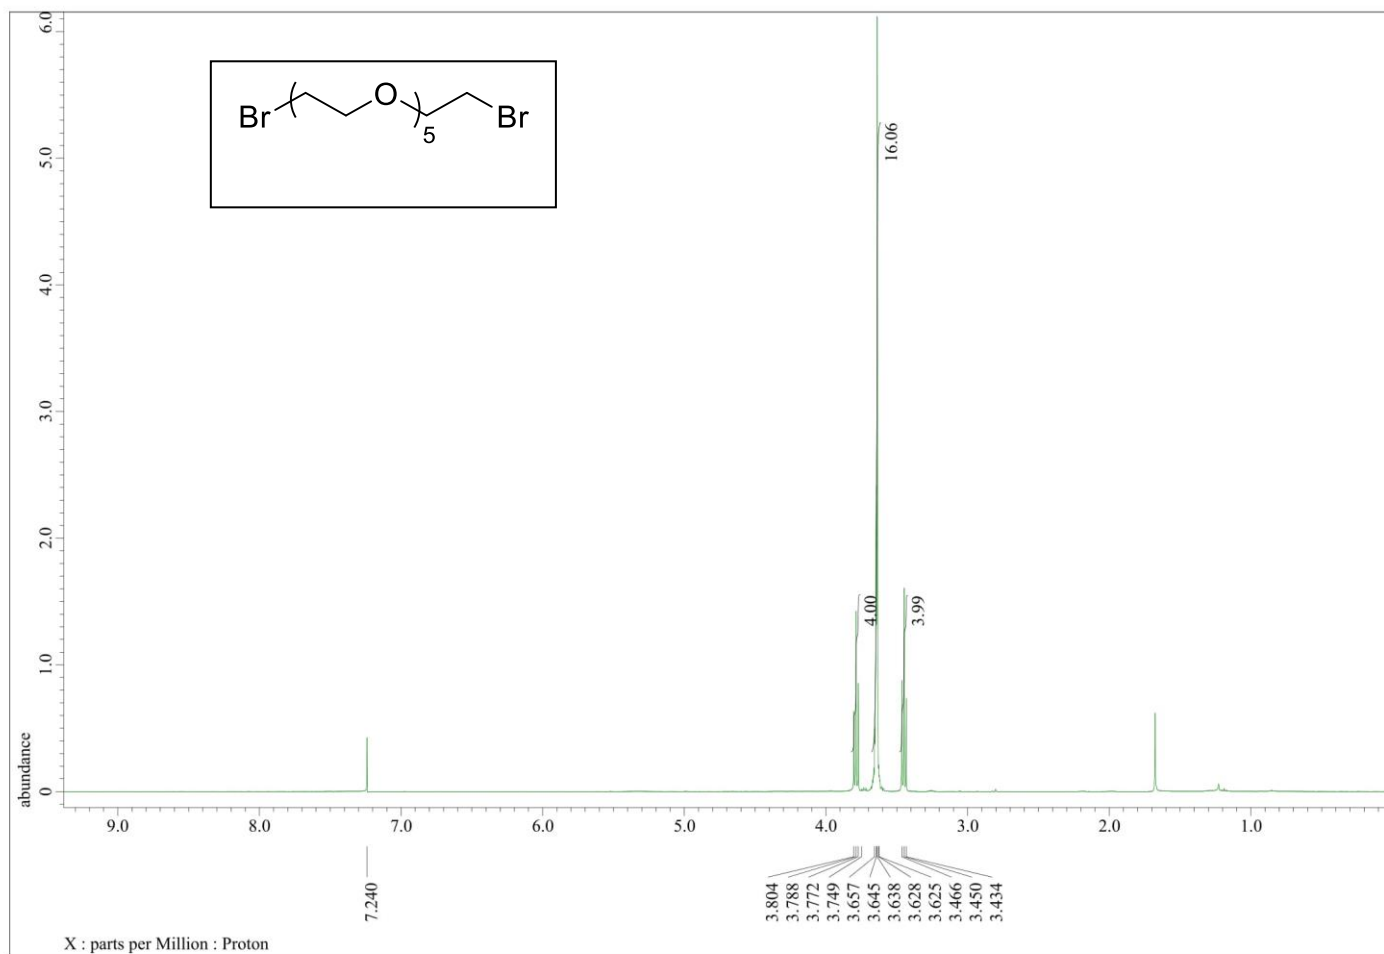

**1,17-dibromo-3,6,9,12,15-pentaoxaheptadecane (entry 10 in Table 2)**

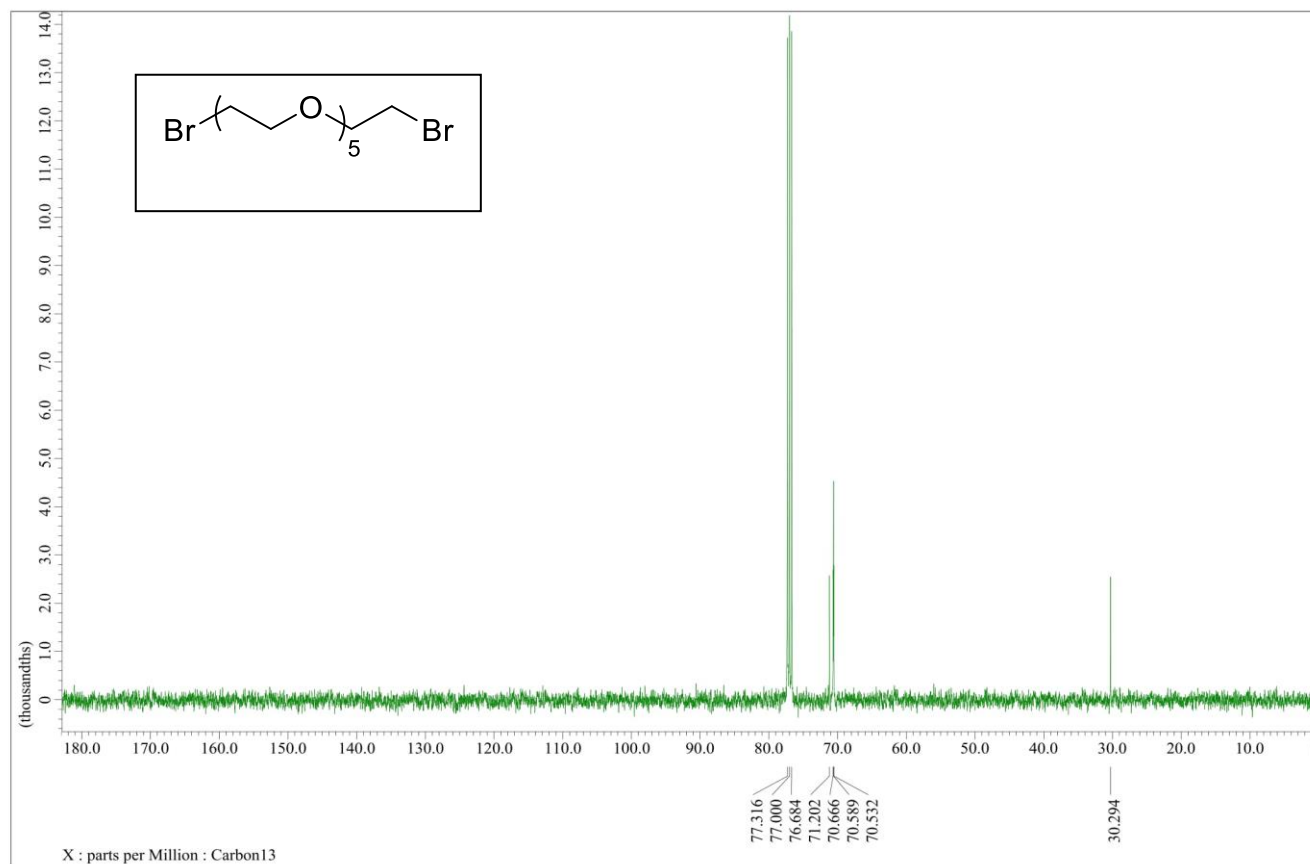

**3-((2-oxo-2H-chromen-4-yl)oxy)propyl methanesulfonate (entry 7 in Table 2)**

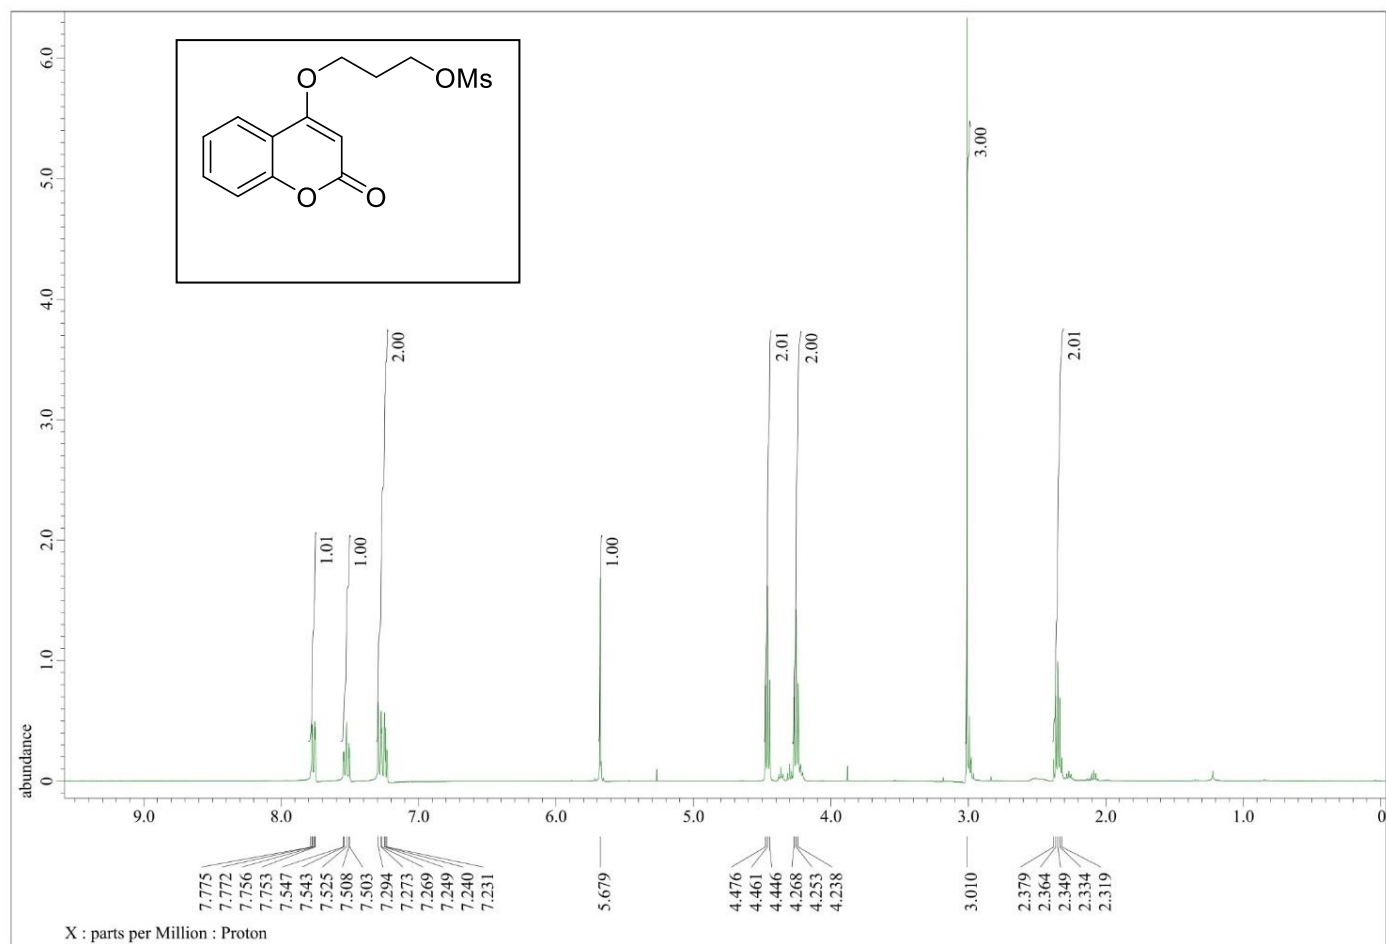

**3-((2-oxo-2H-chromen-4-yl)oxy)propyl methanesulfonate (entry 7 in Table 2)**

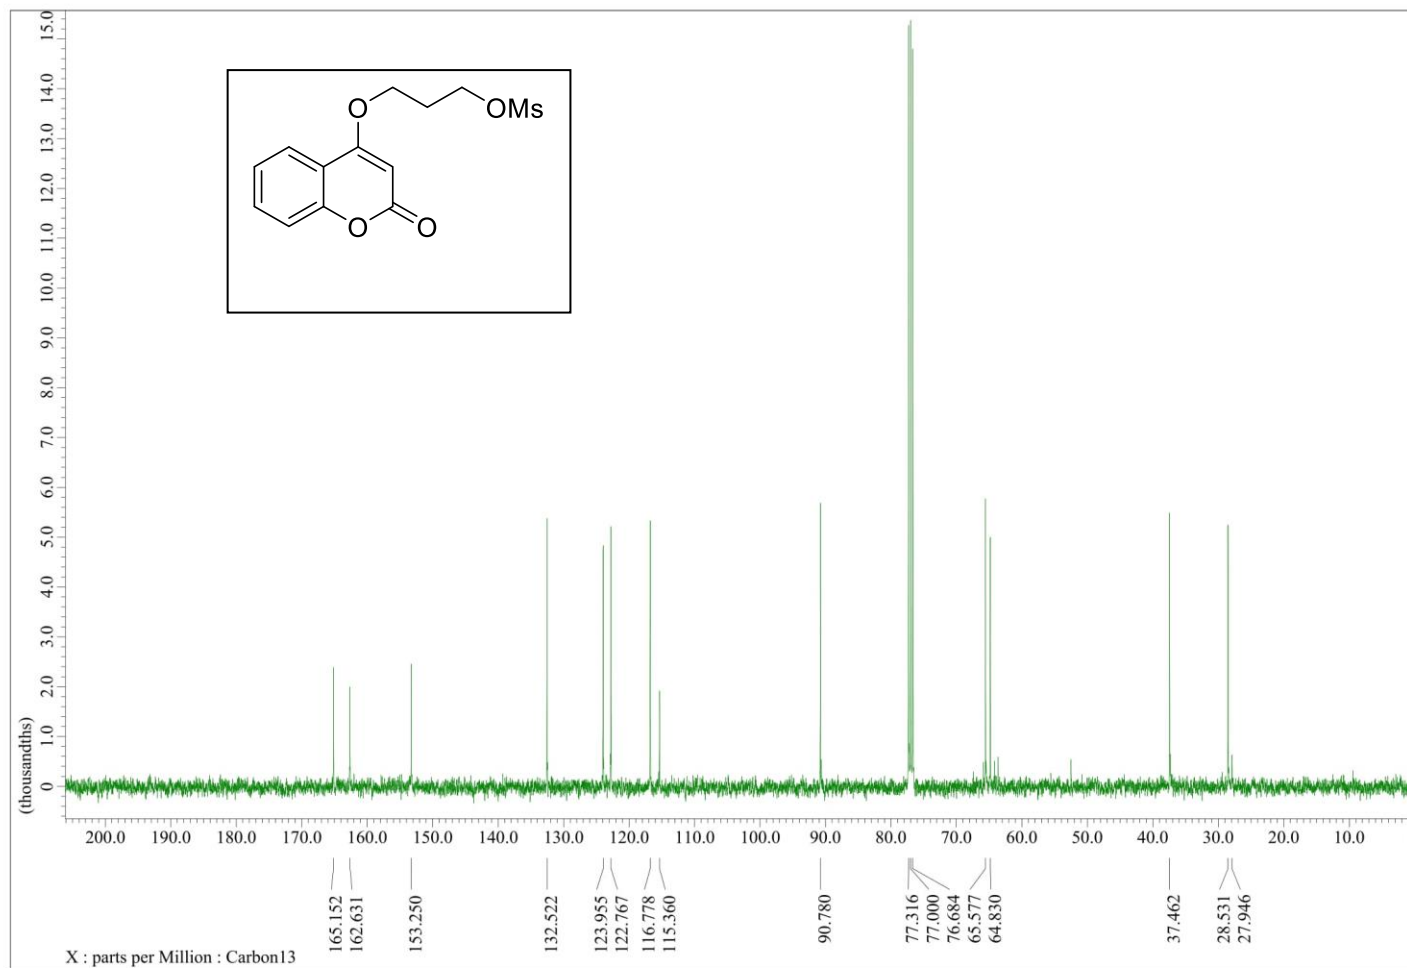

**4-(3-bromopropoxy)-2H-chromen-2-one (entry 8 in Table 2)**

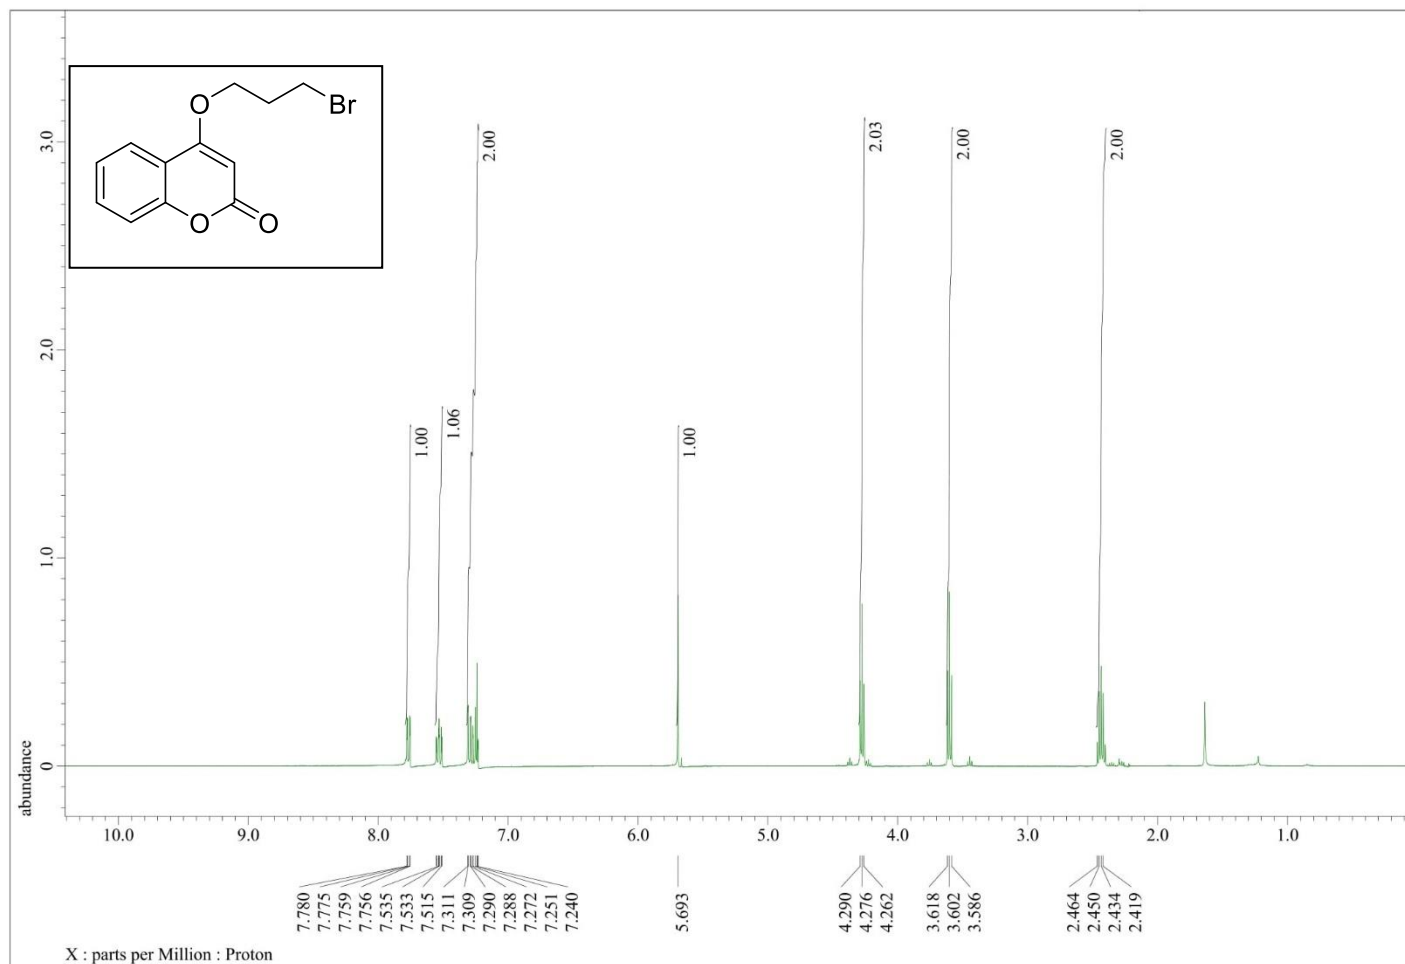



**4-(3-bromopropoxy)-2H-chromen-2-one (entry 8 in Table 2)**

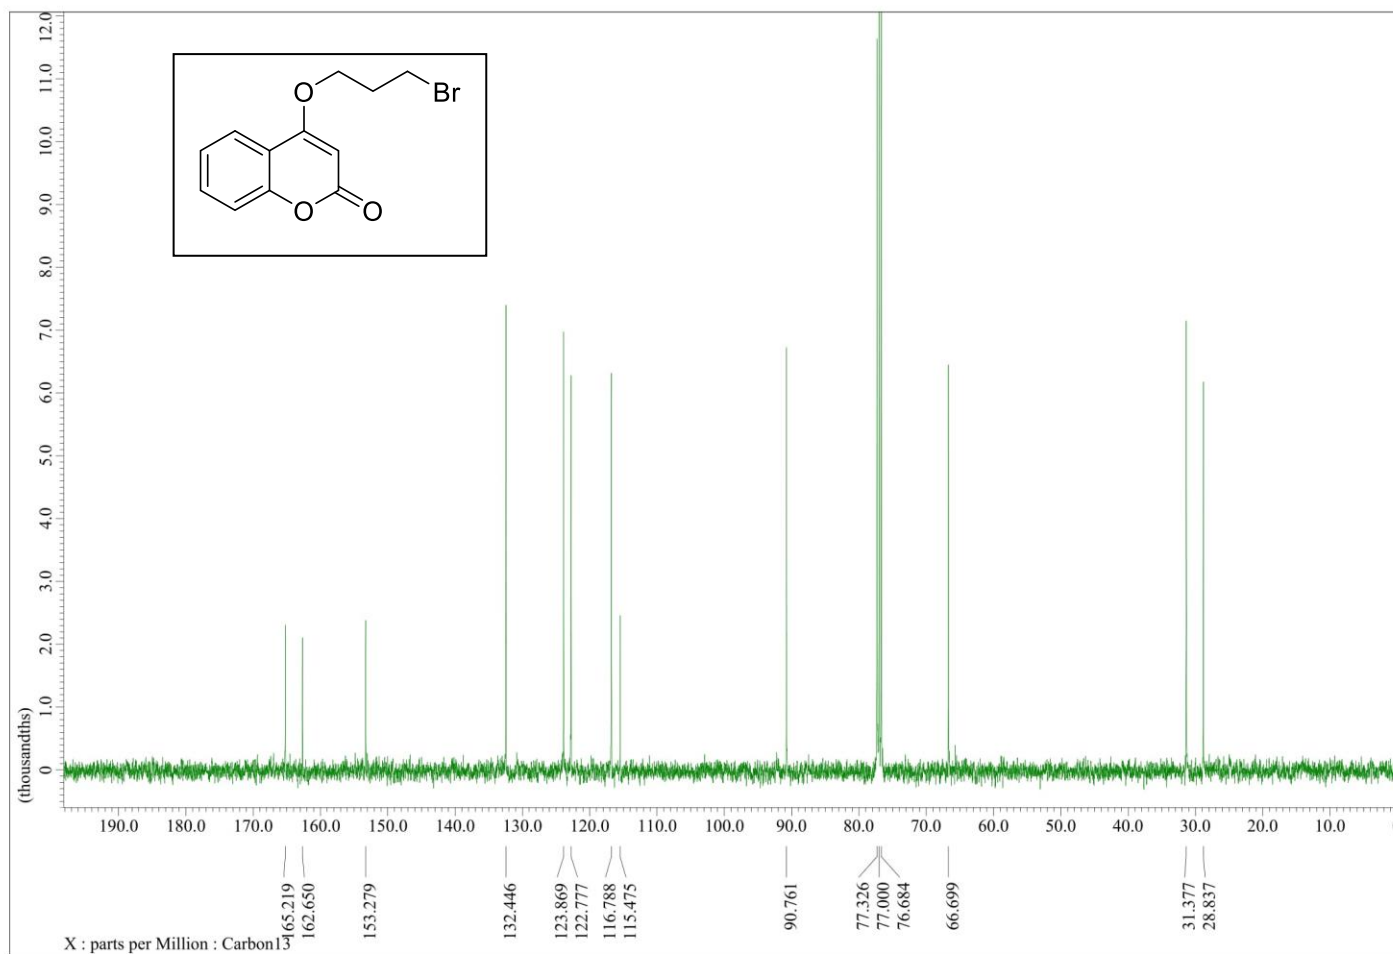

**4-(3-iodopropoxy)-2H-chromen-2-one (entry 9 in Table 2)**

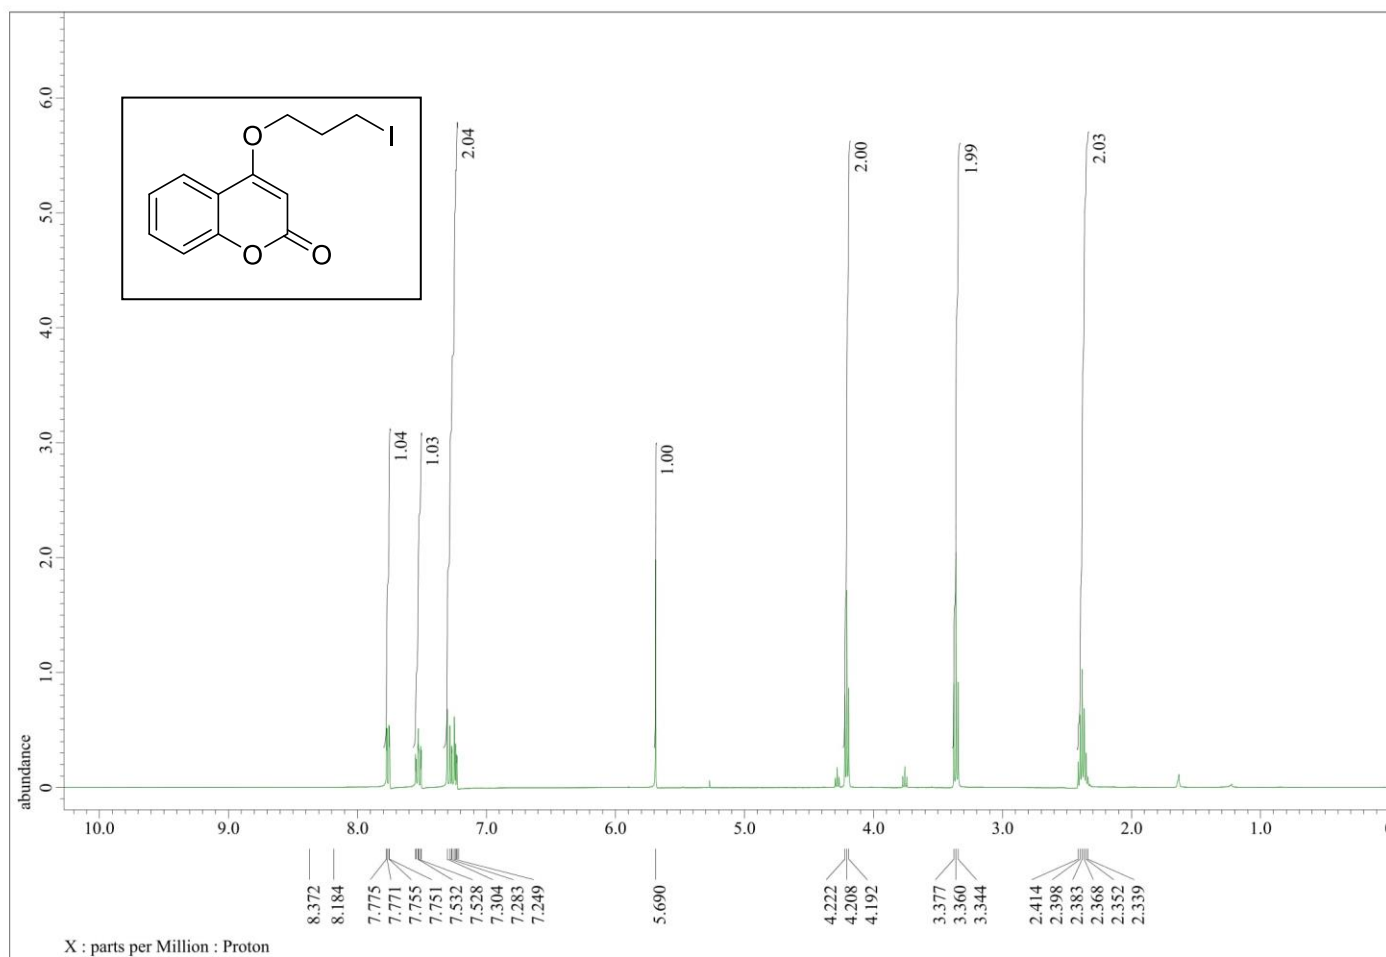

**4-(3-iodopropoxy)-2H-chromen-2-one (entry 9 in Table 2)**

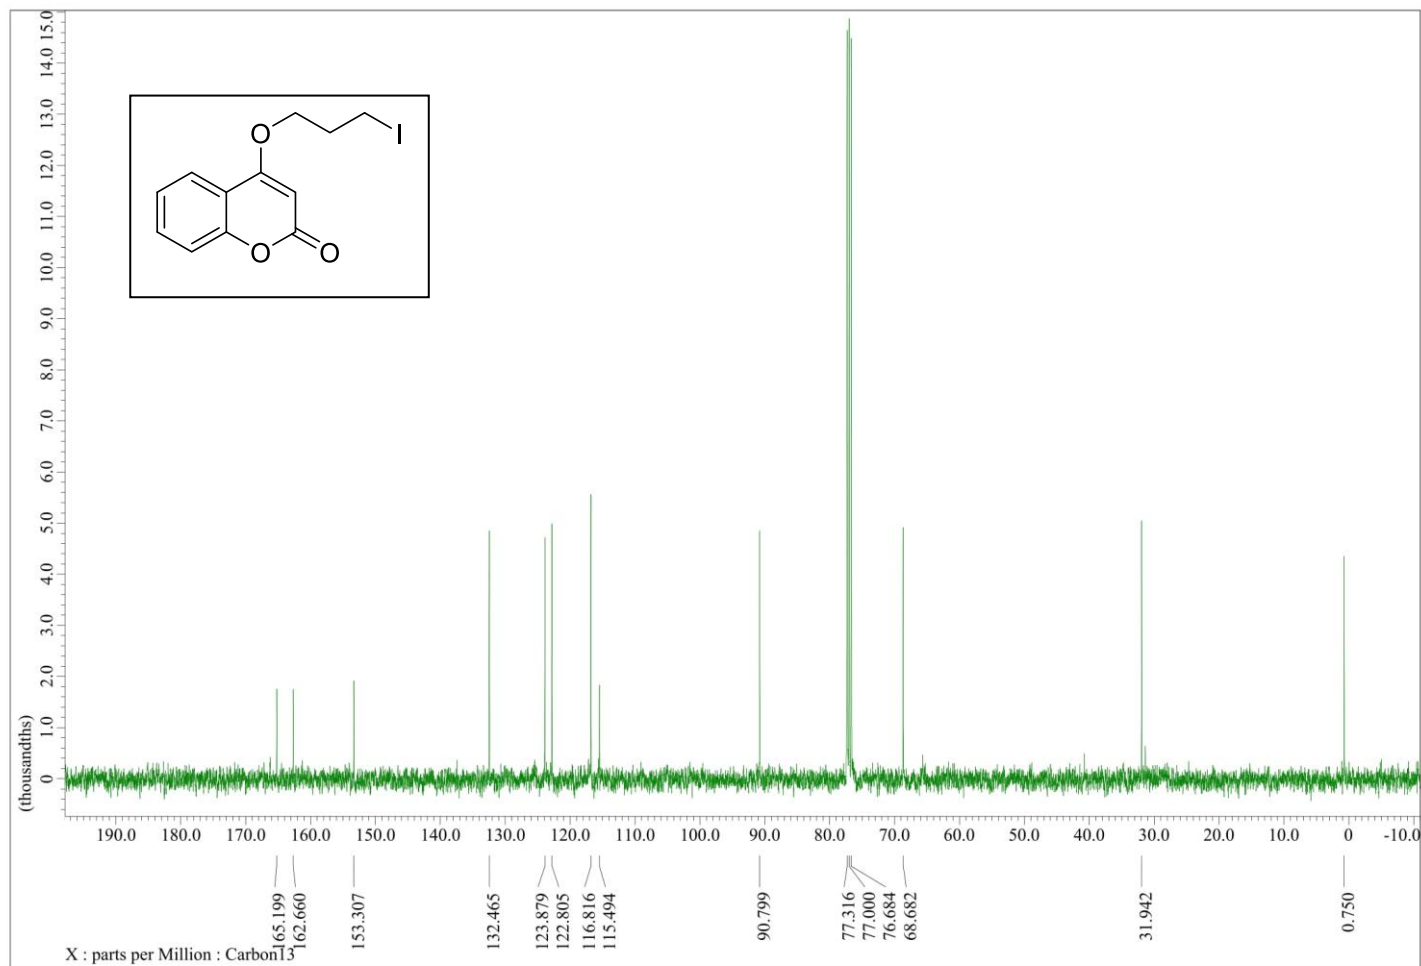

**3-(4-nitrophenoxy)propyl methanesulfonate (entry 11 in Table 2)**

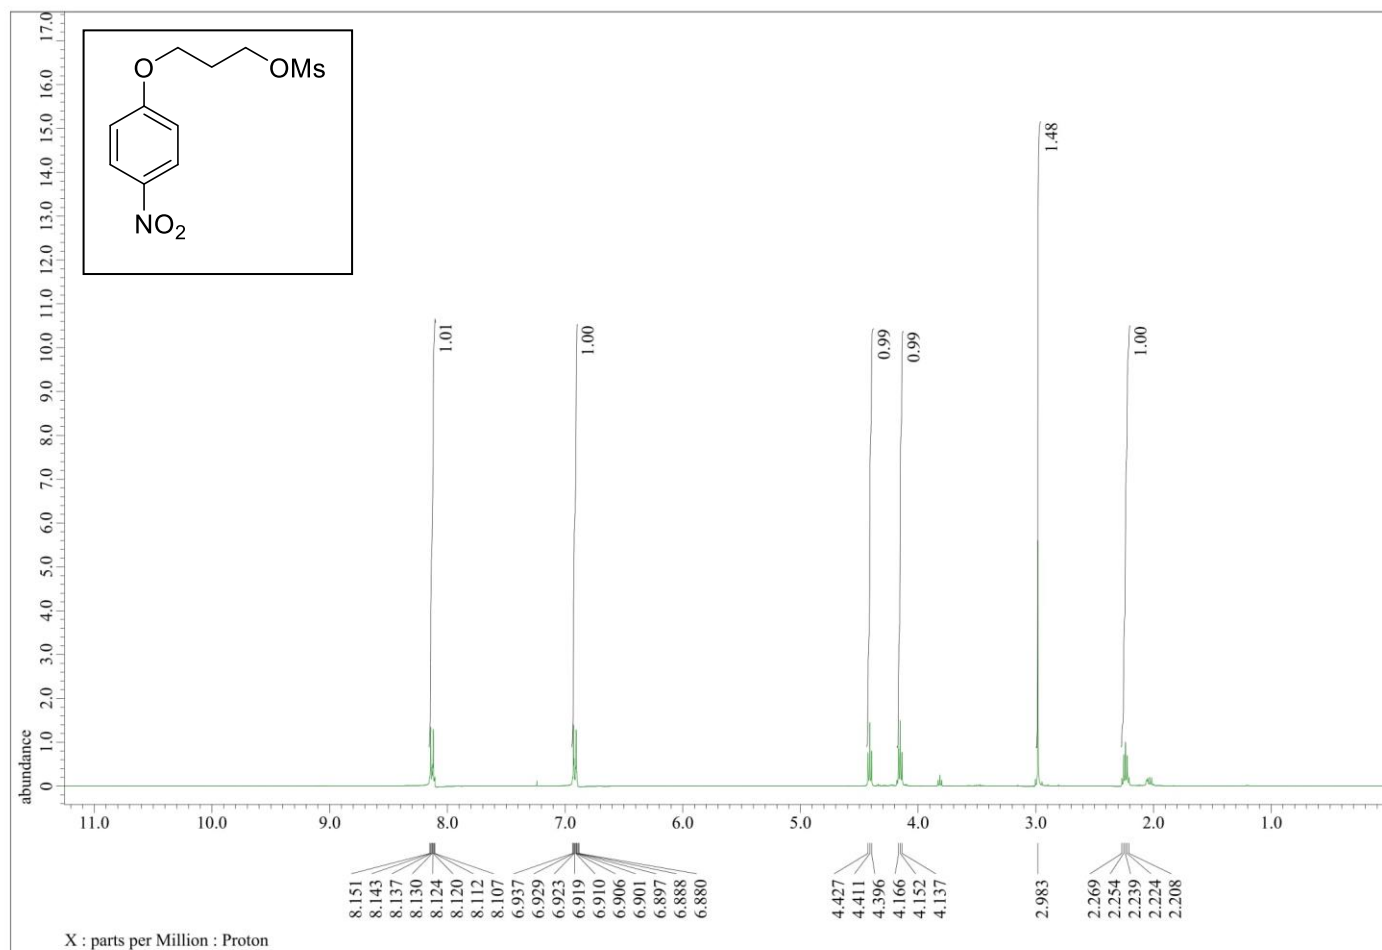

**3-(4-nitrophenoxy)propyl methanesulfonate (entry 11 in Table 2)**

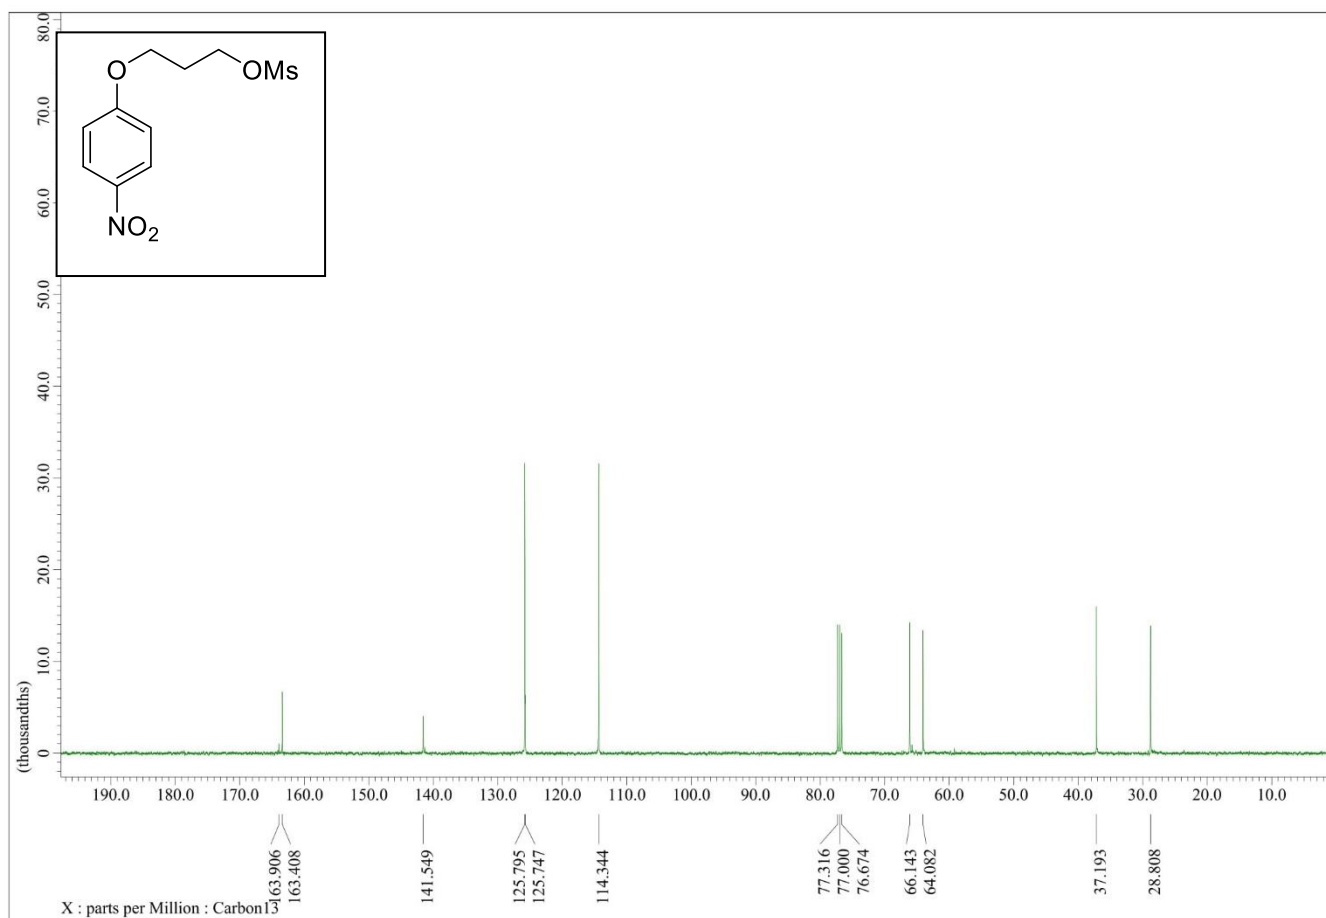

**1-(3-Bromopropyl)-4-nitroimidazole (entry 12 in Table 2):**

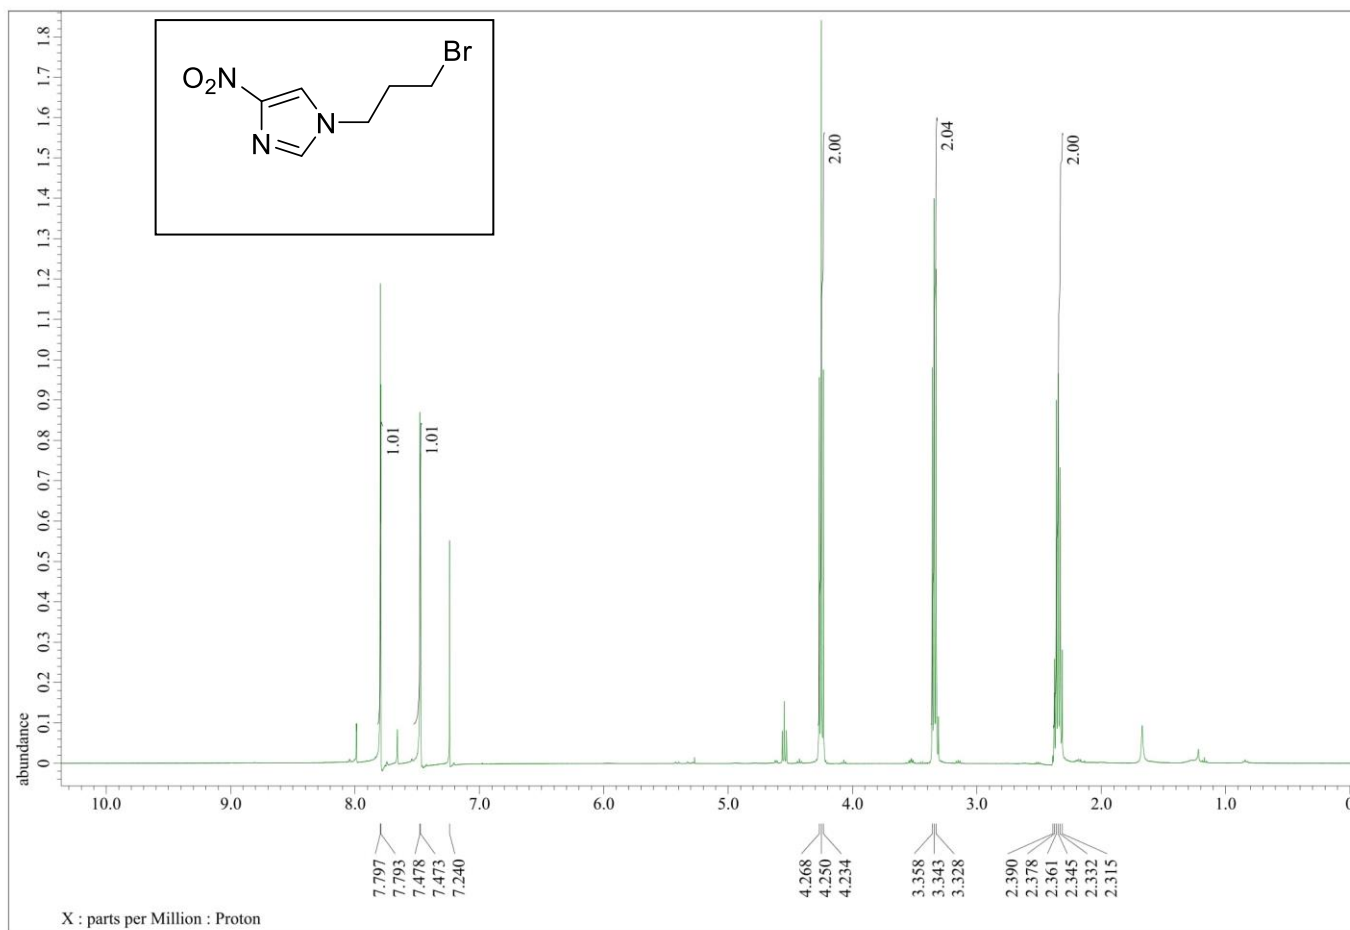

**1-(3-Bromopropyl)-4-nitroimidazole (entry 12 in Table 2):**

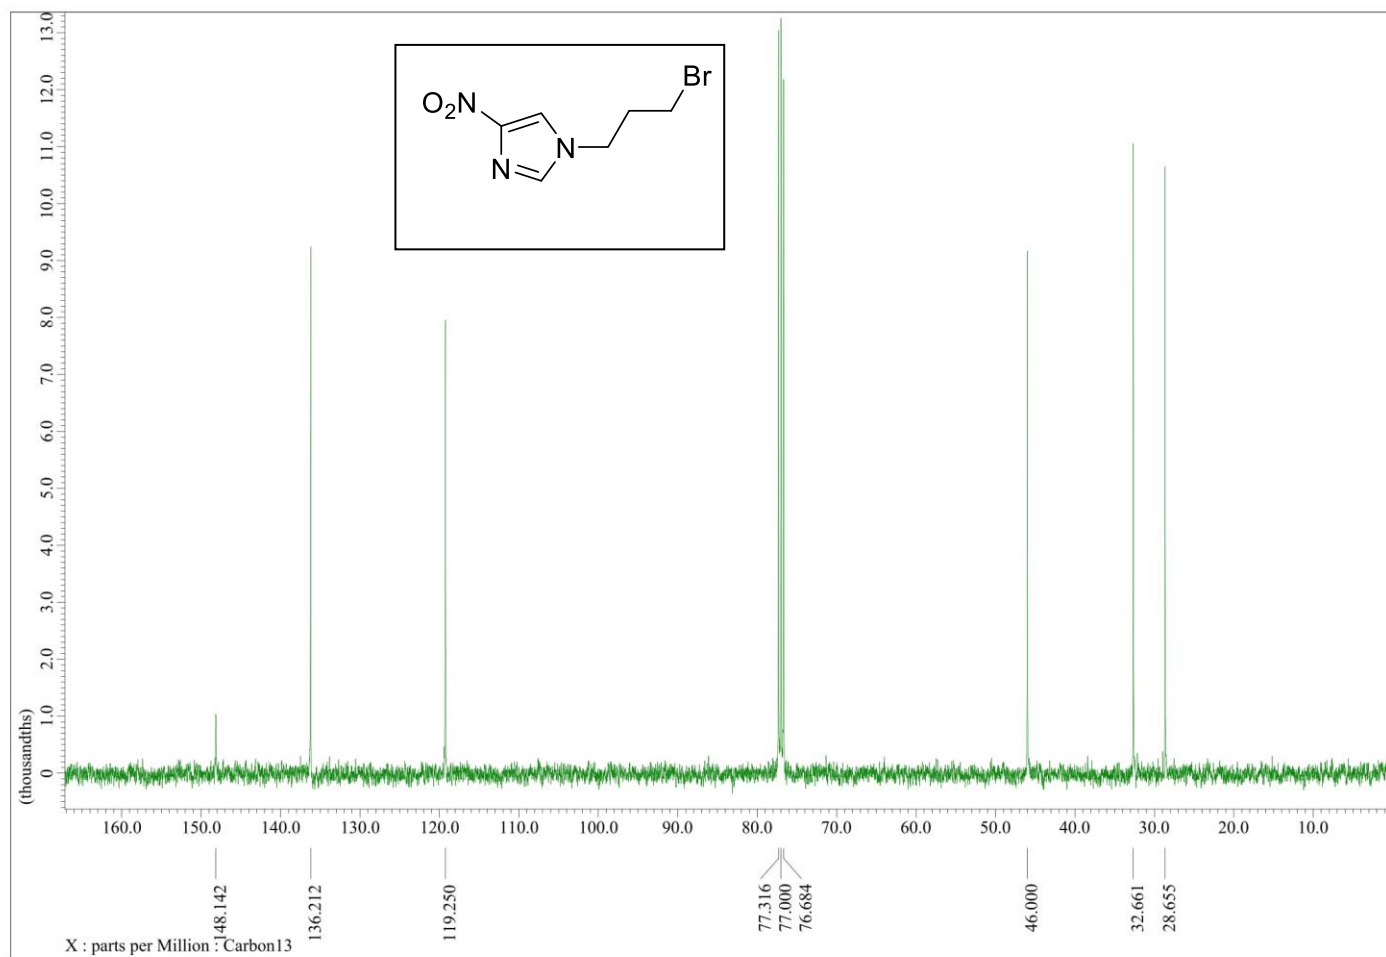

**1,2:3,4-Di-*O*-isopropylidene-6- methanesulfonate -6-deoxy- $\alpha$ -D- galactopyranose (entry 13 in Table 2)**

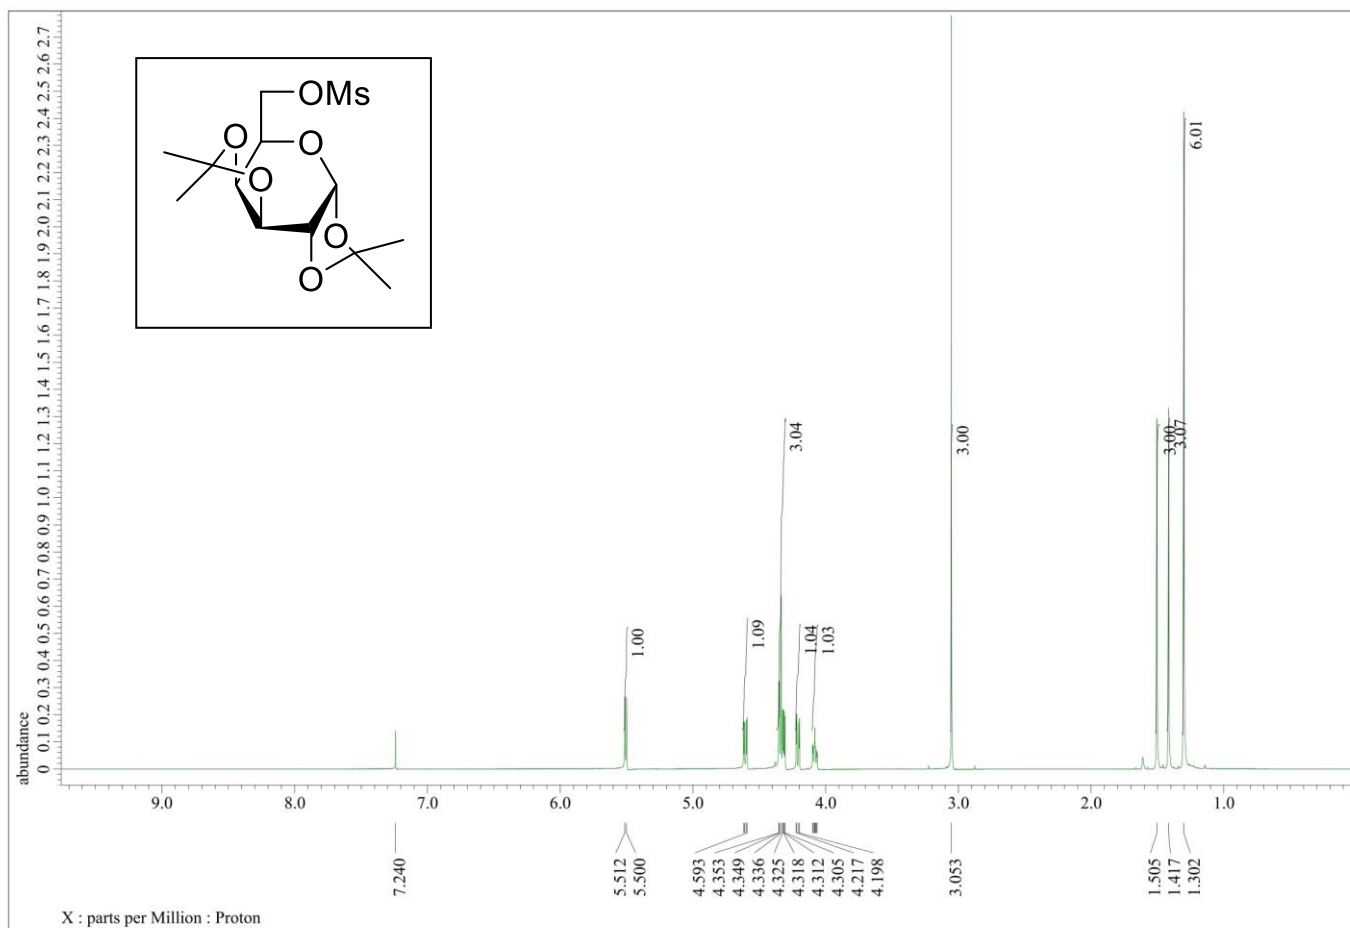



**1,2:3,4-Di-*O*-isopropylidene-6- methanesulfonate -6-deoxy- $\alpha$ -D- galactopyranose (entry 13 in Table 2)**

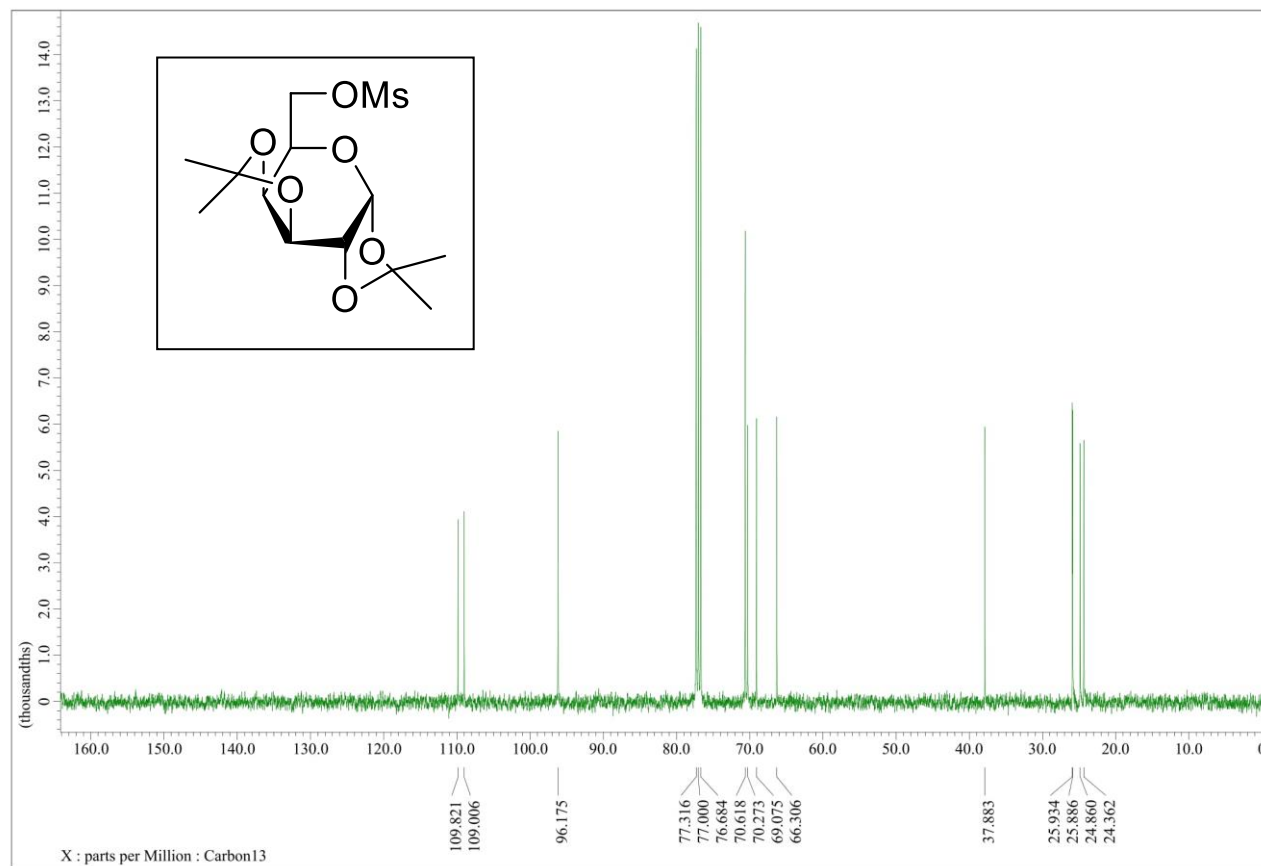

**3-Chloro-picoline N-oxide (entry 14 in Table 2)**

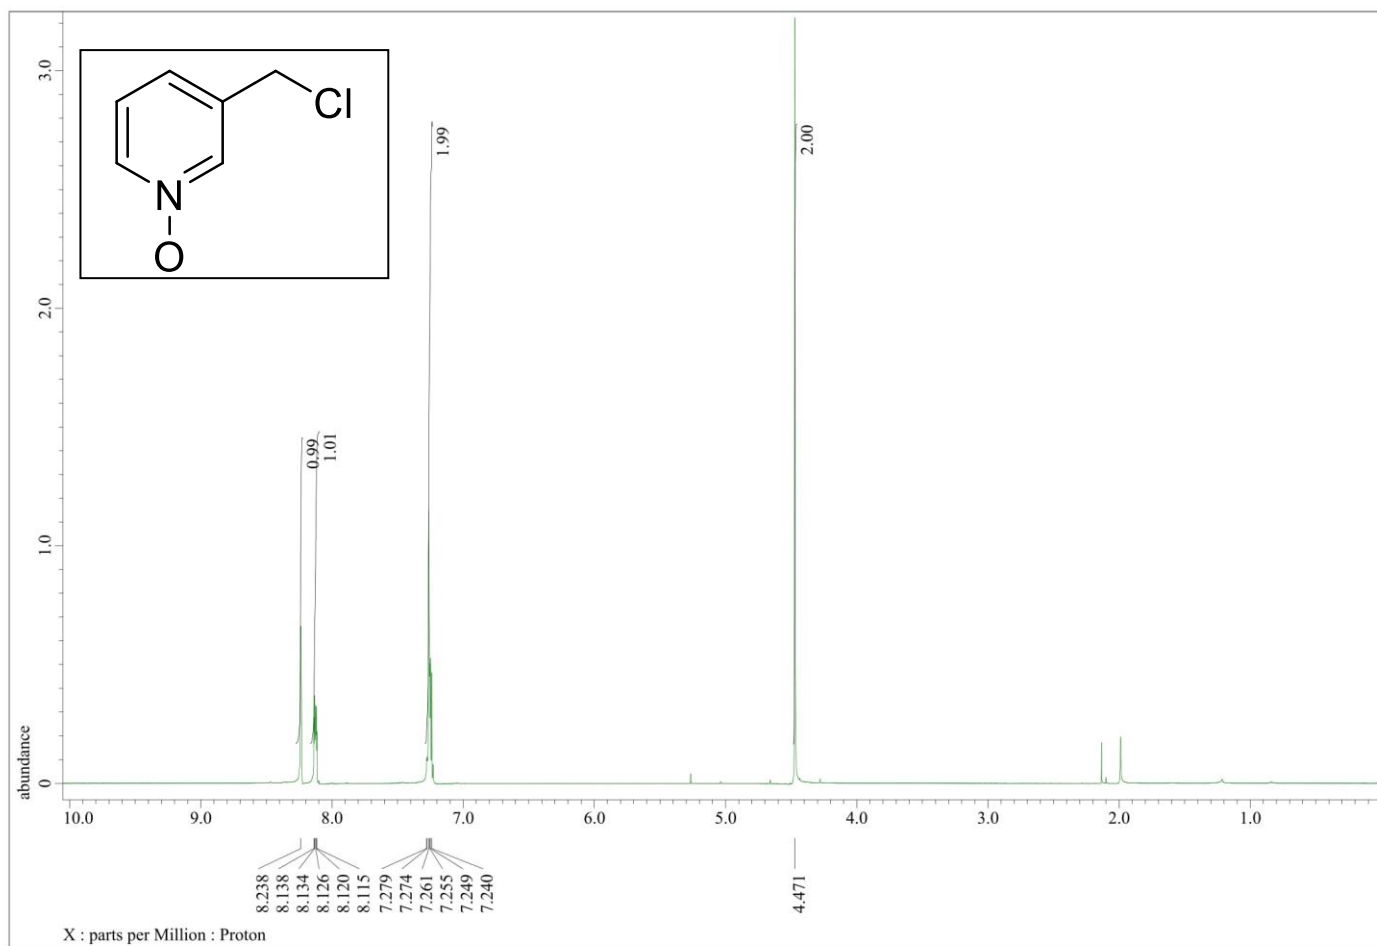

**3-Chloro-picoline N-oxide (entry 14 in Table 2)**

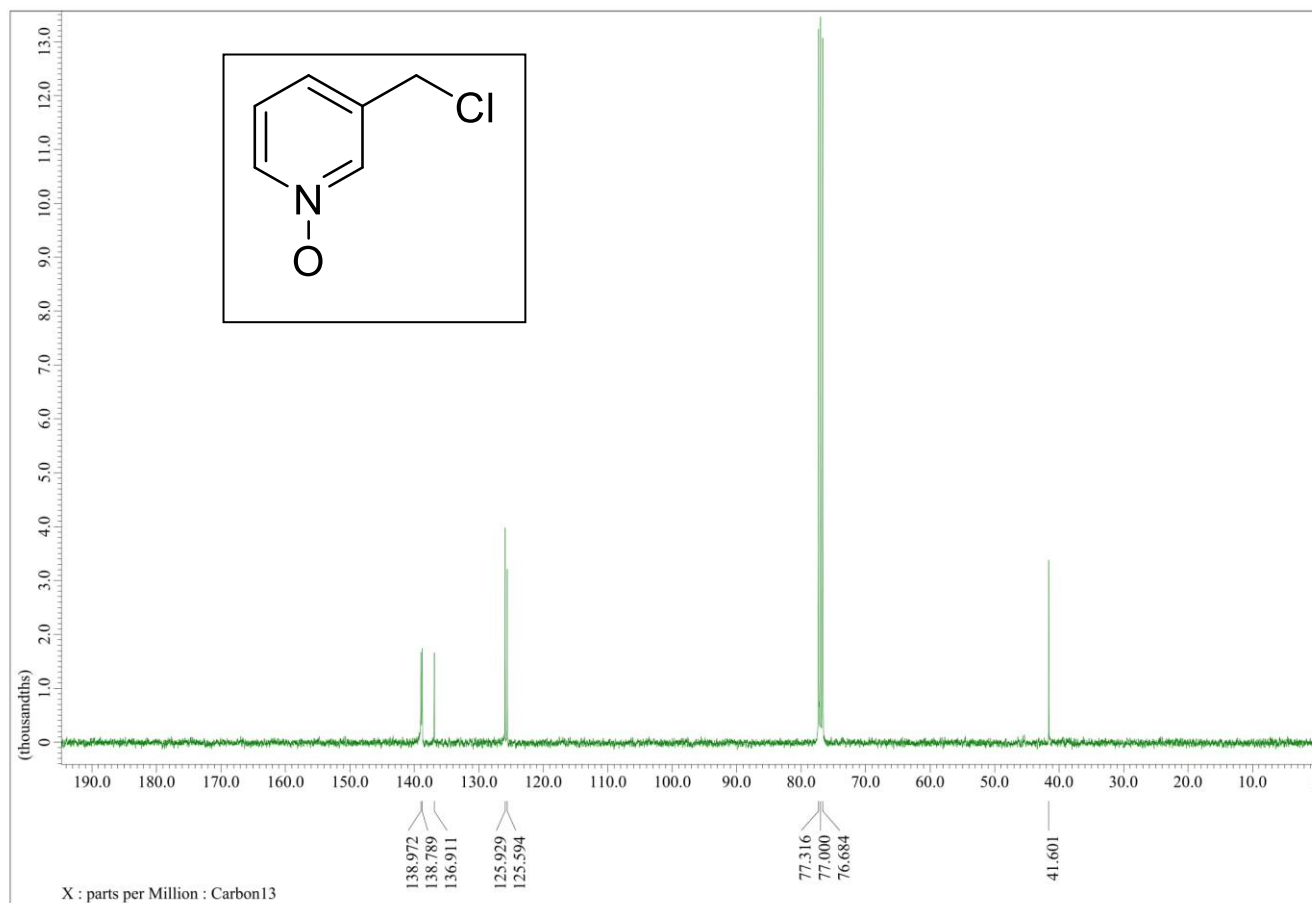

**3-*O*-(3-Methanesulfonylpropyl)estrone (entry 16 in Table 2)**

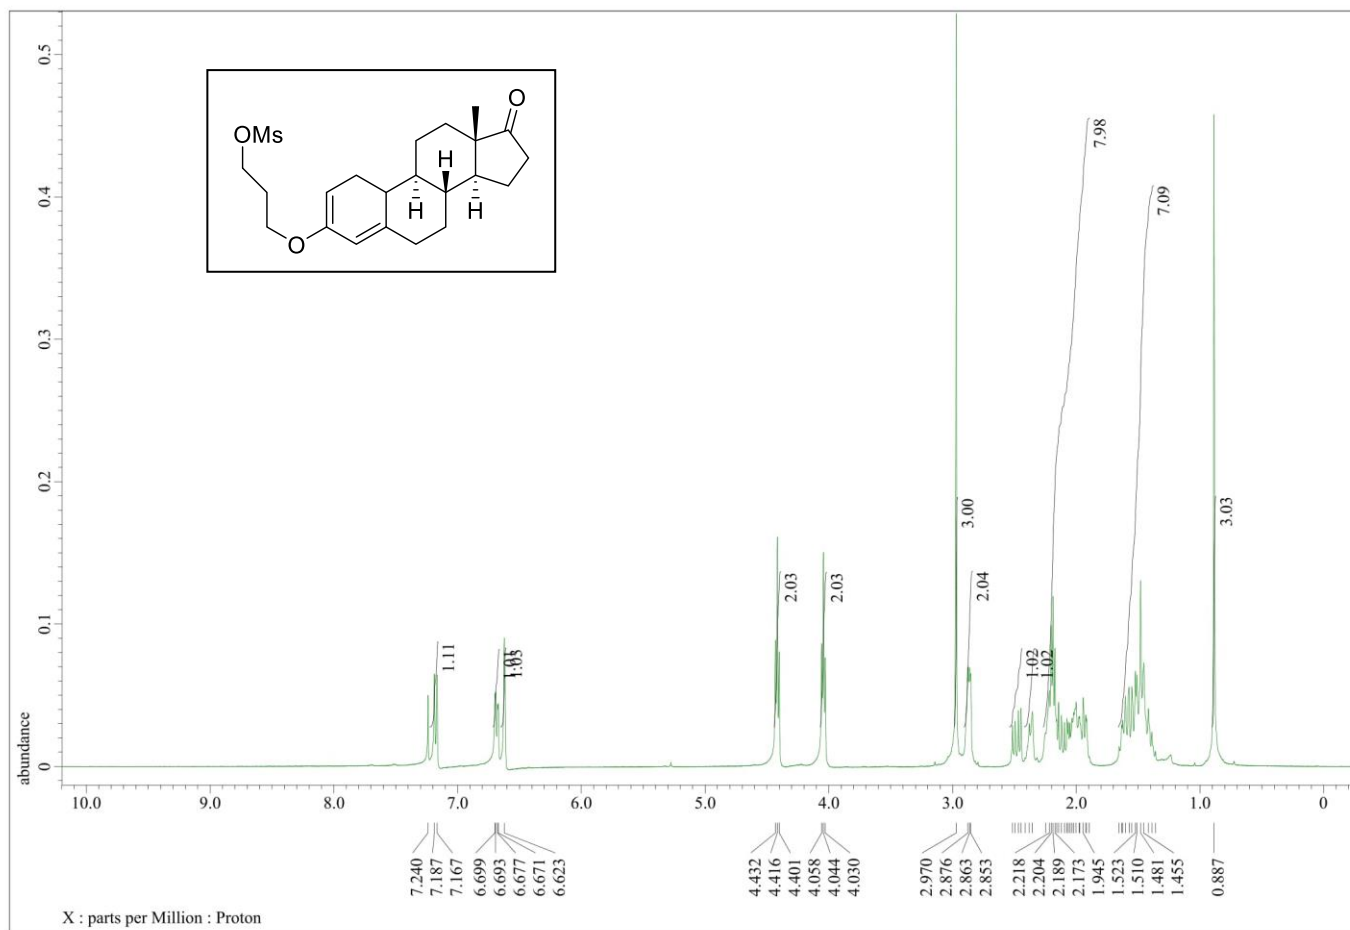

**3-*O*-(3-Methanesulfonylpropyl)estrone (entry 16 in Table 2)**

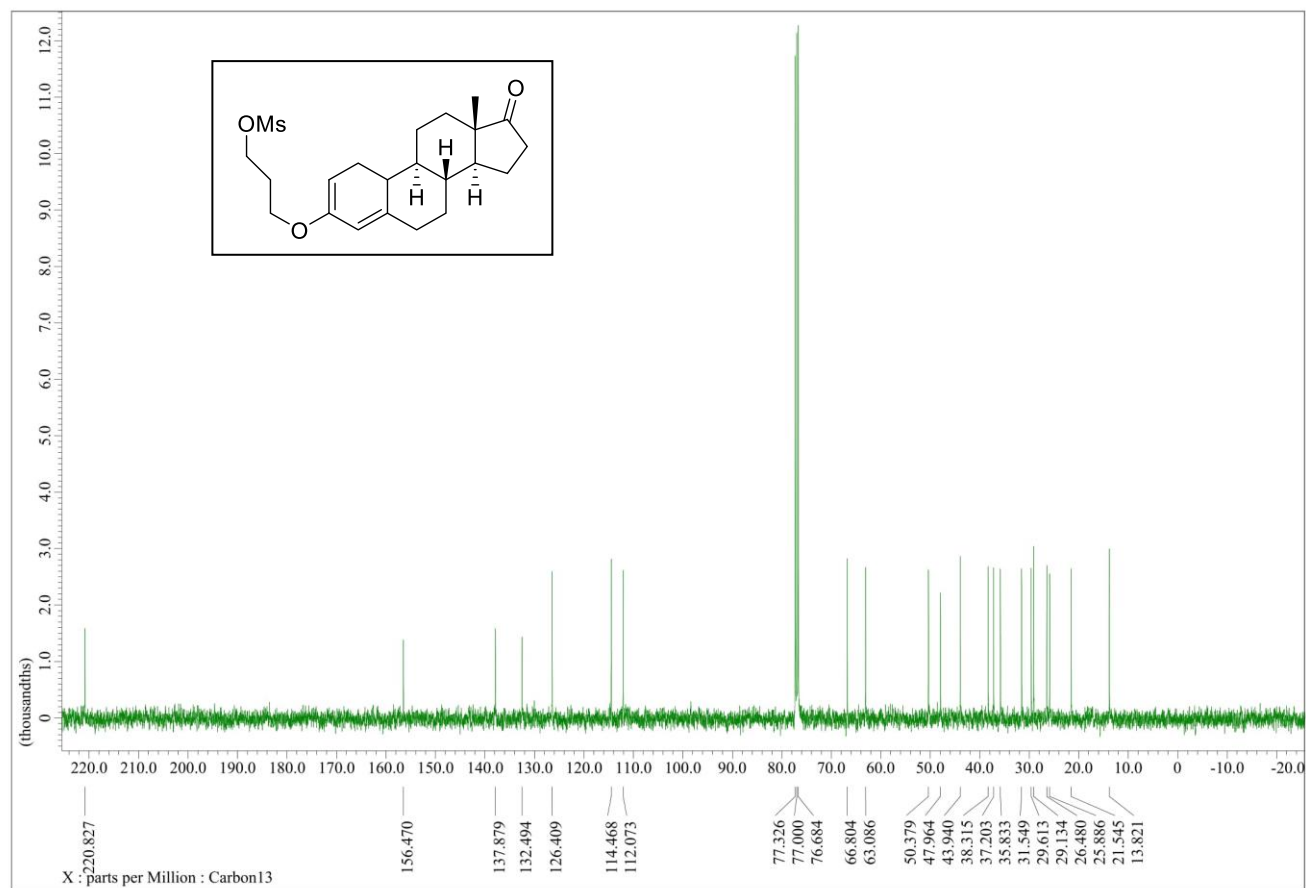

Supplement: s1 [file s1]
